# Supplementary material for: Dental fear association between mothers and adolescents—a longitudinal study
Source: PeerJ. 2020 May 13;8:e9154. doi: 10.7717/peerj.9154 (PMC7229765; doi:10.7717/peerj.9154)
Supplement: Supplemental Information 7 — Original dental fear scores [file peerj-08-9154-s007.xlsx]

## Sheet: Sheet1
NO	Ref No	MQ2_Q1	MQ2_Q2	MQ2_Q3	MQ2_Q4.1	MQ2_Q4.2	MQ2_Q4.3	MQ2_Q5	MQ2_Q6	MQ2_Q7	MQ2_Q8	MQ2_Q9	MQ2_Q10	MQ2_Q11	MQ2_Q12	MQ2_Q13	MQ2_Q14	MQ2_Q15	MQ2_Q16	MQ2_Q17	MQ2_Q18	MQ2_Q19	MQ2_Q20	Specification	MQ2_Q21	Specification	MQ2_Q22	MQ2_Q23	MQ2_Q23.1	MQ2_Q23.2	MQ2_Q23.3	MQ2_Q23.4	MQ2_Q23.5	MQ2_Q23.6	MQ2_Q23.7	MQ2_Q23.8	Secification	MQ2_Q24.1	MQ2_Q24.2	MQ2_Q25	MQ2_Q25a	MQ2_Q26	MQ2_Q26a	MQ2_Q27	MQ2_Q27a	MQ2_Q28	MQ2_Q28a	MQ2_Q29	MQ2_Q29a
1	HK01-01-001	99	99	99	99	99	99	99	99	99	99	99	99	99	99	99	99	99	99	99	99	99	99	99	99	99	99	99	99	99	99	99	99	99	99	99	99	99	99	99	99	99	99	99	99	99	99	99	99
2	HK01-01-002	3	3	2	3	4	4	1	2	1	1	1	3	2	2	2	4	5	5	4	5	1	1	88	4	感冒藥	2	1	88	88	88	88	88	88	88	88		0	0	6	1	6	1	5	1	2	1	6	2
3	HK01-01-003	99	99	99	99	99	99	99	99	99	99	99	99	99	99	99	99	99	99	99	99	99	99	99	99	99	99	99	99	99	99	99	99	99	99	99	99	99	99	99	99	99	99	99	99	99	99	99	99
4	HK01-01-004	99	99	99	99	99	99	99	99	99	99	99	99	99	99	99	99	99	99	99	99	99	99	99	99	99	99	99	99	99	99	99	99	99	99	99	99	99	99	99	99	99	99	99	99	99	99	99	99
5	HK01-01-005	99	99	99	99	99	99	99	99	99	99	99	99	99	99	99	99	99	99	99	99	99	99	99	99	99	99	99	99	99	99	99	99	99	99	99	99	99	99	99	99	99	99	99	99	99	99	99	99
6	HK01-01-006	2	4	2	3	3	3	2	1	1	1	2	3	2	2	2	1	4	4	1	5	1	2	高血壓	4	血壓藥	2	1	88	88	88	88	88	88	88	88		99	99	5	1	6	1	6	1	5	1	6	1
7	HK01-01-007	99	99	99	99	99	99	99	99	99	99	99	99	99	99	99	99	99	99	99	99	99	99	99	99	99	99	99	99	99	99	99	99	99	99	99	99	99	99	99	99	99	99	99	99	99	99	99	99
8	HK01-01-008	99	99	99	99	99	99	99	99	99	99	99	99	99	99	99	99	99	99	99	99	99	99	99	99	99	99	99	99	99	99	99	99	99	99	99	99	99	99	99	99	99	99	99	99	99	99	99	99
9	HK01-01-009	99	99	99	99	99	99	99	99	99	99	99	99	99	99	99	99	99	99	99	99	99	99	99	99	99	99	99	99	99	99	99	99	99	99	99	99	99	99	99	99	99	99	99	99	99	99	99	99
10	HK01-01-010	3	3	1	4	3	4	2	2	1	1	2	2	1	2	2	2	5	4	1	5	1	1	88	1	88	2	1	88	88	88	88	88	88	88	88		1	99	6	1	6	1	5	0.5	4	1	4	1
11	HK01-01-011	99	99	99	99	99	99	99	99	99	99	99	99	99	99	99	99	99	99	99	99	99	99	99	99	99	99	99	99	99	99	99	99	99	99	99	99	99	99	99	99	99	99	99	99	99	99	99	99
12	HK01-01-012	3	1	2	3	4	1	1	1	2	2	2	3	1	2	2	4	5	4	1	5	1	1	88	1	88	3	2	0	0	0	0	0	1	1	0		0	0	4	1	4	2	2	1	5	1	4	0.5
13	HK01-01-013	99	99	99	99	99	99	99	99	99	99	99	99	99	99	99	99	99	99	99	99	99	99	99	99	99	99	99	99	99	99	99	99	99	99	99	99	99	99	99	99	99	99	99	99	99	99	99	99
14	HK01-01-014	3	1	2	3	4	4	1	2	1	1	2	3	2	2	2	2	5	4	1	5	1	1	88	1	88	2	1	88	88	88	88	88	88	88	88		1	99	6	1	6	1	3	1	3	1	5	1
15	HK01-01-015	99	99	99	99	99	99	99	99	99	99	99	99	99	99	99	99	99	99	99	99	99	99	99	99	99	99	99	99	99	99	99	99	99	99	99	99	99	99	99	99	99	99	99	99	99	99	99	99
16	HK01-01-016	99	99	99	99	99	99	99	99	99	99	99	99	99	99	99	99	99	99	99	99	99	99	99	99	99	99	99	99	99	99	99	99	99	99	99	99	99	99	99	99	99	99	99	99	99	99	99	99
17	HK01-01-017	99	99	99	99	99	99	99	99	99	99	99	99	99	99	99	99	99	99	99	99	99	99	99	99	99	99	99	99	99	99	99	99	99	99	99	99	99	99	99	99	99	99	99	99	99	99	99	99
18	HK02-02-018	99	99	99	99	99	99	99	99	99	99	99	99	99	99	99	99	99	99	99	99	99	99	99	99	99	99	99	99	99	99	99	99	99	99	99	99	99	99	99	99	99	99	99	99	99	99	99	99
19	HK02-02-019	3	1	1	3	4	4	3	1	1	2	2	4	2	2	2	3	4	3	2	5	1	2	血壓高	4	血壓藥	3	2	0	0	0	0	0	1	1	0		1	10	6	2	5	1	5	1	3	1	5	2
20	HK02-02-020	99	99	99	99	99	99	99	99	99	99	99	99	99	99	99	99	99	99	99	99	99	99	99	99	99	99	99	99	99	99	99	99	99	99	99	99	99	99	99	99	99	99	99	99	99	99	99	99
21	HK02-02-021	3	1	1	3	1	1	2	2	1	1	1	2	1	2	2	3	5	5	1	5	1	1	88	1	88	2	1	88	88	88	88	88	88	88	88		0	0	2	1	5	1	5	1	3	1	5	1
22	HK02-02-022	99	99	99	99	99	99	99	99	99	99	99	99	99	99	99	99	99	99	99	99	99	99	99	99	99	99	99	99	99	99	99	99	99	99	99	99	99	99	99	99	99	99	99	99	99	99	99	99
23	HK02-03-023	3	1	1	4	4	1	2	1	1	1	2	2	2	2	2	2	4	4	1	5	1	1	88	1	88	3	1	88	88	88	88	88	88	88	88		0	0	5	1	5	1	5	1	4	1	5	2
24	HK02-03-024	99	99	99	99	99	99	99	99	99	99	99	99	99	99	99	99	99	99	99	99	99	99	99	99	99	99	99	99	99	99	99	99	99	99	99	99	99	99	99	99	99	99	99	99	99	99	99	99
25	HK02-03-025	99	99	99	99	99	99	99	99	99	99	99	99	99	99	99	99	99	99	99	99	99	99	99	99	99	99	99	99	99	99	99	99	99	99	99	99	99	99	99	99	99	99	99	99	99	99	99	99
26	HK02-03-026	3	4	2	3	3	1	2	1	1	2	2	3	1	2	2	4	4	5	1	5	1	1	88	4	調理身體中藥	3	1	88	88	88	88	88	88	88	88		0.5	99	5	0.5	5	1	4	1-2	2	1	4	2-3
27	HK02-03-027	99	99	99	99	99	99	99	99	99	99	99	99	99	99	99	99	99	99	99	99	99	99	99	99	99	99	99	99	99	99	99	99	99	99	99	99	99	99	99	99	99	99	99	99	99	99	99	99
28	HK02-03-028	99	99	99	99	99	99	99	99	99	99	99	99	99	99	99	99	99	99	99	99	99	99	99	99	99	99	99	99	99	99	99	99	99	99	99	99	99	99	99	99	99	99	99	99	99	99	99	99
29	HK02-03-029	3	1	1	4	4	4	3	2	1	2	3	5	4	2	2	3	5	4	2	4	2	2	鼻敏感、哮喘、甲狀腺、高血壓、抑鬱	4	99	3	2	1	0	0	0	0	1	0	0		99	99	6	1	6	2	4	1	2	0.5	5	4
30	HK03-04-030	99	99	99	99	99	99	99	99	99	99	99	99	99	99	99	99	99	99	99	99	99	99	99	99	99	99	99	99	99	99	99	99	99	99	99	99	99	99	99	99	99	99	99	99	99	99	99	99
31	HK03-04-031	3	3	2	4	4	4	2	1	1	2	3	3	3	2	2	4	4	5	1	5	2	2	生蛇	4	治療生蛇藥物	2	1	88	88	88	88	88	88	88	88		0	0	6	1	6	1	4	0.5	2	1	6	0.5
32	HK03-04-032	3	3	2	3	3	3	3	2	1	2	2	3	3	2	2	2	4	4	1	5	2	1	88	2	88	3	2	0	0	0	0	1	0	0	0		99	99	5	1	4	1	3	1	3	1	3	1
33	HK03-04-033	3	1	1	4	4	3	1	1	4	1	2	3	3	2	1	1	4	4	2	5	1	1	88	1	88	1	1	88	88	88	88	88	88	88	88		1	99	5	0.5	5	2	5	2	5	1	2	2
34	HK03-04-034	99	99	99	99	99	99	99	99	99	99	99	99	99	99	99	99	99	99	99	99	99	99	99	99	99	99	99	99	99	99	99	99	99	99	99	99	99	99	99	99	99	99	99	99	99	99	99	99
35	HK03-04-035	99	99	99	99	99	99	99	99	99	99	99	99	99	99	99	99	99	99	99	99	99	99	99	99	99	99	99	99	99	99	99	99	99	99	99	99	99	99	99	99	99	99	99	99	99	99	99	99
36	HK03-04-036	99	99	99	99	99	99	99	99	99	99	99	99	99	99	99	99	99	99	99	99	99	99	99	99	99	99	99	99	99	99	99	99	99	99	99	99	99	99	99	99	99	99	99	99	99	99	99	99
37	HK03-04-037	99	99	99	99	99	99	99	99	99	99	99	99	99	99	99	99	99	99	99	99	99	99	99	99	99	99	99	99	99	99	99	99	99	99	99	99	99	99	99	99	99	99	99	99	99	99	99	99
38	HK03-04-038	99	99	99	99	99	99	99	99	99	99	99	99	99	99	99	99	99	99	99	99	99	99	99	99	99	99	99	99	99	99	99	99	99	99	99	99	99	99	99	99	99	99	99	99	99	99	99	99
39	HK03-04-039	3	4	2	4	4	4	1	1	1	1	1	4	2	2	2	4	5	4	1	5	1	1	88	1	88	3	1	88	88	88	88	88	88	88	88		1	20	6	1	5	1	3	1	1	0	4	1
40	HK03-04-040	3	3	1	4	1	1	3	1	1	1	1	2	2	2	2	2	2	4	1	5	1	1	88	1	88	1	1	88	88	88	88	88	88	88	88		99	99	6	1	6	1	5	1	3	1	5	2
41	HK03-04-041	3	3	2	4	4	4	1	1	1	1	1	3	1	2	2	2	3	4	1	5	1	1	88	1	88	2	1	88	88	88	88	88	88	88	88		0	0	6	2-3	6	2-3	5	1	2	1	5	3
42	HK03-04-042	99	99	99	99	99	99	99	99	99	99	99	99	99	99	99	99	99	99	99	99	99	99	99	99	99	99	99	99	99	99	99	99	99	99	99	99	99	99	99	99	99	99	99	99	99	99	99	99
43	HK03-04-043	3	1	2	3	4	3	2	2	1	1	1	4	3	2	2	2	4	2	1	5	1	1	88	1	88	2	2	0	0	0	0	0	1	0	0		0	0	6	1	6	2	5	1	3	1	6	2
44	HK03-04-044	99	99	99	99	99	99	99	99	99	99	99	99	99	99	99	99	99	99	99	99	99	99	99	99	99	99	99	99	99	99	99	99	99	99	99	99	99	99	99	99	99	99	99	99	99	99	99	99
45	HK03-04-045	3	1	2	4	4	3	2	2	1	1	3	4	3	2	2	3	5	4	1	5	2	1	88	4	心臟藥、止暈藥，relax藥	2	1	88	88	88	88	88	88	88	88		0	0	3	1	6	1	5	1	5	1	3	2
46	HK03-04-046	99	99	99	99	99	99	99	99	99	99	99	99	99	99	99	99	99	99	99	99	99	99	99	99	99	99	99	99	99	99	99	99	99	99	99	99	99	99	99	99	99	99	99	99	99	99	99	99
47	HK03-04-047	99	99	99	99	99	99	99	99	99	99	99	99	99	99	99	99	99	99	99	99	99	99	99	99	99	99	99	99	99	99	99	99	99	99	99	99	99	99	99	99	99	99	99	99	99	99	99	99
99	HK03-05-048	99	99	99	99	99	99	99	99	99	99	99	99	99	99	99	99	99	99	99	99	99	99	99	99	99	99	99	99	99	99	99	99	99	99	99	99	99	99	99	99	99	99	99	99	99	99	99	99
49	HK03-05-049	99	99	99	99	99	99	99	99	99	99	99	99	99	99	99	99	99	99	99	99	99	99	99	99	99	99	99	99	99	99	99	99	99	99	99	99	99	99	99	99	99	99	99	99	99	99	99	99
50	HK03-05-050	99	99	99	99	99	99	99	99	99	99	99	99	99	99	99	99	99	99	99	99	99	99	99	99	99	99	99	99	99	99	99	99	99	99	99	99	99	99	99	99	99	99	99	99	99	99	99	99
51	HK03-05-051	99	99	99	99	99	99	99	99	99	99	99	99	99	99	99	99	99	99	99	99	99	99	99	99	99	99	99	99	99	99	99	99	99	99	99	99	99	99	99	99	99	99	99	99	99	99	99	99
52	HK03-05-052	99	99	99	99	99	99	99	99	99	99	99	99	99	99	99	99	99	99	99	99	99	99	99	99	99	99	99	99	99	99	99	99	99	99	99	99	99	99	99	99	99	99	99	99	99	99	99	99
53	HK03-05-053	99	99	99	99	99	99	99	99	99	99	99	99	99	99	99	99	99	99	99	99	99	99	99	99	99	99	99	99	99	99	99	99	99	99	99	99	99	99	99	99	99	99	99	99	99	99	99	99
54	HK03-05-054	99	99	99	99	99	99	99	99	99	99	99	99	99	99	99	99	99	99	99	99	99	99	99	99	99	99	99	99	99	99	99	99	99	99	99	99	99	99	99	99	99	99	99	99	99	99	99	99
55	HK03-05-055	99	99	99	99	99	99	99	99	99	99	99	99	99	99	99	99	99	99	99	99	99	99	99	99	99	99	99	99	99	99	99	99	99	99	99	99	99	99	99	99	99	99	99	99	99	99	99	99
56	HK03-05-056	3	2	2	4	3	3	3	4	1	1	1	4	3	2	1	1	1	3	1	5	2	1	88	4	高血壓藥	2	1	88	88	88	88	88	88	88	88	88	4	99	5	99	5	1	5	99	5	99	5	3
57	HK03-05-057	99	99	99	99	99	99	99	99	99	99	99	99	99	99	99	99	99	99	99	99	99	99	99	99	99	99	99	99	99	99	99	99	99	99	99	99	99	99	99	99	99	99	99	99	99	99	99	99
58	HK03-05-058	3	3	1	4	4	1	2	2	1	1	3	3	3	2	2	3	4	4	1	5	2	1	88	1	88	4	2	0	0	0	0	0	1	1	0		2-3	99	3	1	4	1	4	1	4	1	4	1
59	HK03-05-059	99	99	99	99	99	99	99	99	99	99	99	99	99	99	99	99	99	99	99	99	99	99	99	99	99	99	99	99	99	99	99	99	99	99	99	99	99	99	99	99	99	99	99	99	99	99	99	99
60	HK03-05-060	3	1	1	2	3	3	1	2	1	2	1	3	1	2	2	2	4	5	1	5	1	1	88	1	88	2	1	88	88	88	88	88	88	88	88	88	0	0	7	0.5	7	1	7	0.5	3	1	4	1
61	HK03-05-061	99	99	99	99	99	99	99	99	99	99	99	99	99	99	99	99	99	99	99	99	99	99	99	99	99	99	99	99	99	99	99	99	99	99	99	99	99	99	99	99	99	99	99	99	99	99	99	99
62	HK03-05-062	99	99	99	99	99	99	99	99	99	99	99	99	99	99	99	99	99	99	99	99	99	99	99	99	99	99	99	99	99	99	99	99	99	99	99	99	99	99	99	99	99	99	99	99	99	99	99	99
63	HK03-05-063	2	1	2	4	3	3	1	1	1	1	2	3	2	2	2	3	1	1	1	5	1	1	88	1	88	2	2	0	0	0	0	0	0	1	0		99	99	5	1	5	1	5	1	1	0	5	1
64	HK03-05-064	3	1	2	2	4	4	3	1	1	3	2	3	3	2	2	2	5	4	1	5	1	1	88	1	88	2	1	88	88	88	88	88	88	88	88	88	0	0	6	1	6	1	5	1	2	1	6	2
65	HK03-05-065	3	1	1	4	4	2	3	1	1	2	3	3	3	2	2	3	4	4	1	5	1	1	88	1	88	2	1	88	88	88	88	88	88	88	88	88	5	90	6	1	5	2	3	99	99	99	99	99
66	HK03-05-066	3	3	2	4	4	1	2	1	1	1	2	3	4	2	2	1	5	4	1	5	1	1	88	1	88	2	1	88	88	88	88	88	88	88	88	88	99	99	6	1	6	2	6	1	3	1	5	2
67	HK03-05-067	2	1	2	4	4	4	4	1	1	2	3	3	2	2	2	2	5	5	1	5	2	1	88	1	88	2	1	88	88	88	88	88	88	88	88	88	99	99	6	1	6	1	4	1	3	0.5	6	5
68	HK03-05-068	99	99	99	99	99	99	99	99	99	99	99	99	99	99	99	99	99	99	99	99	99	99	99	99	99	99	99	99	99	99	99	99	99	99	99	99	99	99	99	99	99	99	99	99	99	99	99	99
69	HK03-05-069	99	99	99	99	99	99	99	99	99	99	99	99	99	99	99	99	99	99	99	99	99	99	99	99	99	99	99	99	99	99	99	99	99	99	99	99	99	99	99	99	99	99	99	99	99	99	99	99
70	HK03-06-070	99	99	99	99	99	99	99	99	99	99	99	99	99	99	99	99	99	99	99	99	99	99	99	99	99	99	99	99	99	99	99	99	99	99	99	99	99	99	99	99	99	99	99	99	99	99	99	99
71	HK03-06-071	3	1	2	4	3	4	2	1	1	1	2	3	3	2	2	3	5	4	1	5	2	1	88	4	鐵劑	2	1	88	88	88	88	88	88	88	88	88	1	99	4	1	4	0.5	5	1	1	0	6	1
72	HK03-06-072	3	1	2	4	4	1	2	2	1	2	3	4	3	2	2	3	4	4	4	5	1	1	88	2	88	3	2	0	0	0	0	0	1	0	0		0	0	6	1	5	1	4	1	2	1	4	1
73	HK03-06-073	2	1	2	4	4	3	3	2	1	1	2	3	3	2	2	4	4	4	1	5	1	1	88	1	88	3	1	88	88	88	88	88	88	88	88	88	1	99	6	1	6	1	3	1	3	99	5	99
74	HK03-06-074	99	99	99	99	99	99	99	99	99	99	99	99	99	99	99	99	99	99	99	99	99	99	99	99	99	99	99	99	99	99	99	99	99	99	99	99	99	99	99	99	99	99	99	99	99	99	99	99
75	HK03-06-075	99	99	99	99	99	99	99	99	99	99	99	99	99	99	99	99	99	99	99	99	99	99	99	99	99	99	99	99	99	99	99	99	99	99	99	99	99	99	99	99	99	99	99	99	99	99	99	99
76	HK03-07-076	2	1	1	4	3	2	1	1	1	1	3	3	3	2	2	4	5	1	1	5	2	1	88	1	88	4	1	88	88	88	88	88	88	88	88	88	3	90	5	1	3	1	3	1	2	0.5	5	4
77	HK03-07-077	99	99	99	99	99	99	99	99	99	99	99	99	99	99	99	99	99	99	99	99	99	99	99	99	99	99	99	99	99	99	99	99	99	99	99	99	99	99	99	99	99	99	99	99	99	99	99	99
78	HK03-07-078	99	99	99	99	99	99	99	99	99	99	99	99	99	99	99	99	99	99	99	99	99	99	99	99	99	99	99	99	99	99	99	99	99	99	99	99	99	99	99	99	99	99	99	99	99	99	99	99
79	HK03-07-079	99	99	99	99	99	99	99	99	99	99	99	99	99	99	99	99	99	99	99	99	99	99	99	99	99	99	99	99	99	99	99	99	99	99	99	99	99	99	99	99	99	99	99	99	99	99	99	99
80	HK03-07-080	99	99	99	99	99	99	99	99	99	99	99	99	99	99	99	99	99	99	99	99	99	99	99	99	99	99	99	99	99	99	99	99	99	99	99	99	99	99	99	99	99	99	99	99	99	99	99	99
81	HK03-07-081	3	3	2	3	3	1	2	1	1	2	2	3	3	2	2	3	2	2	1	5	2	1	88	1	88	3	2	0	0	0	0	0	1	1	0		0	0	6	1	6	1	3	1	3	1	5	1
82	HK03-07-082	99	99	99	99	99	99	99	99	99	99	99	99	99	99	99	99	99	99	99	99	99	99	99	99	99	99	99	99	99	99	99	99	99	99	99	99	99	99	99	99	99	99	99	99	99	99	99	99
83	HK03-07-083	99	99	99	99	99	99	99	99	99	99	99	99	99	99	99	99	99	99	99	99	99	99	99	99	99	99	99	99	99	99	99	99	99	99	99	99	99	99	99	99	99	99	99	99	99	99	99	99
84	HK03-07-084	3	1	1	3	4	3	1	1	1	2	2	3	1	2	2	2	5	4	1	5	1	2	高血壓	4	高血壓藥	2	1	88	88	88	88	88	88	88	88	88	0	0	6	1	6	1	5	1	3	1	6	2
85	HK03-07-085	99	99	99	99	99	99	99	99	99	99	99	99	99	99	99	99	99	99	99	99	99	99	99	99	99	99	99	99	99	99	99	99	99	99	99	99	99	99	99	99	99	99	99	99	99	99	99	99
86	HK03-07-086	99	99	99	99	99	99	99	99	99	99	99	99	99	99	99	99	99	99	99	99	99	99	99	99	99	99	99	99	99	99	99	99	99	99	99	99	99	99	99	99	99	99	99	99	99	99	99	99
87	HK03-07-087	99	99	99	99	99	99	99	99	99	99	99	99	99	99	99	99	99	99	99	99	99	99	99	99	99	99	99	99	99	99	99	99	99	99	99	99	99	99	99	99	99	99	99	99	99	99	99	99
88	HK03-07-088	99	99	99	99	99	99	99	99	99	99	99	99	99	99	99	99	99	99	99	99	99	99	99	99	99	99	99	99	99	99	99	99	99	99	99	99	99	99	99	99	99	99	99	99	99	99	99	99
89	HK03-07-089	99	99	99	99	99	99	99	99	99	99	99	99	99	99	99	99	99	99	99	99	99	99	99	99	99	99	99	99	99	99	99	99	99	99	99	99	99	99	99	99	99	99	99	99	99	99	99	99
90	HK03-07-090	3	1	2	3	4	4	3	2	1	2	2	3	3	2	2	2	5	4	1	5	1	1	88	2	88	2	2	0	0	0	0	0	1	0	0		10	100	6	2	6	3	6	2	3	2	5	2
91	HK03-07-091	3	1	1	4	3	4	3	1	1	1	3	2	4	2	2	3	3	5	1	5	2	2	乙型肝炎	4	膽固醇，Entecavir 0.5mg	2	1	88	88	88	88	88	88	88	88	88	2	0	6	1	6	1	5	1	2	1	6	3
92	HK03-07-092	99	99	99	99	99	99	99	99	99	99	99	99	99	99	99	99	99	99	99	99	99	99	99	99	99	99	99	99	99	99	99	99	99	99	99	99	99	99	99	99	99	99	99	99	99	99	99	99
93	HK03-07-093	3	1	2	4	4	1	2	1	1	2	1	4	2	2	2	3	5	2	4	5	1	1	88	1	88	4	1	88	88	88	88	88	88	88	88	88	1	99	6	1	6	2	5	2	2	1	5	4
94	HK03-07-094	99	99	99	99	99	99	99	99	99	99	99	99	99	99	99	99	99	99	99	99	99	99	99	99	99	99	99	99	99	99	99	99	99	99	99	99	99	99	99	99	99	99	99	99	99	99	99	99
95	HK03-07-095	3	1	1	4	1	4	2	1	1	1	2	3	2	2	2	4	4	4	2	5	1	1	88	1	88	3	2	0	0	0	0	1	0	0	0		1	0	6	1	1	0	3	0.5	4	1	6	1
96	HK03-07-096	99	99	99	99	99	99	99	99	99	99	99	99	99	99	99	99	99	99	99	99	99	99	99	99	99	99	99	99	99	99	99	99	99	99	99	99	99	99	99	99	99	99	99	99	99	99	99	99
97	HK04-08-097	99	99	99	99	99	99	99	99	99	99	99	99	99	99	99	99	99	99	99	99	99	99	99	99	99	99	99	99	99	99	99	99	99	99	99	99	99	99	99	99	99	99	99	99	99	99	99	99
98	HK04-08-098	3	4	2	3	4	4	1	1	1	1	2	3	5	2	2	1	5	5	1	5	2	1	88	1	88	2	1	88	88	88	88	88	88	88	88	88	0	0	2	1	5	1	5	1	2	1	5	1
99	HK04-08-099	99	99	99	99	99	99	99	99	99	99	99	99	99	99	99	99	99	99	99	99	99	99	99	99	99	99	99	99	99	99	99	99	99	99	99	99	99	99	99	99	99	99	99	99	99	99	99	99
100	HK04-08-100	99	99	99	99	99	99	99	99	99	99	99	99	99	99	99	99	99	99	99	99	99	99	99	99	99	99	99	99	99	99	99	99	99	99	99	99	99	99	99	99	99	99	99	99	99	99	99	99
101	HK04-08-101	99	99	99	99	99	99	99	99	99	99	99	99	99	99	99	99	99	99	99	99	99	99	99	99	99	99	99	99	99	99	99	99	99	99	99	99	99	99	99	99	99	99	99	99	99	99	99	99
102	HK04-08-102	99	99	99	99	99	99	99	99	99	99	99	99	99	99	99	99	99	99	99	99	99	99	99	99	99	99	99	99	99	99	99	99	99	99	99	99	99	99	99	99	99	99	99	99	99	99	99	99
103	HK04-08-103	99	99	99	99	99	99	99	99	99	99	99	99	99	99	99	99	99	99	99	99	99	99	99	99	99	99	99	99	99	99	99	99	99	99	99	99	99	99	99	99	99	99	99	99	99	99	99	99
104	HK04-08-104	99	99	99	99	99	99	99	99	99	99	99	99	99	99	99	99	99	99	99	99	99	99	99	99	99	99	99	99	99	99	99	99	99	99	99	99	99	99	99	99	99	99	99	99	99	99	99	99
105	HK04-08-105	3	1	2	4	4	3	2	2	1	1	2	4	5	2	2	1	2	2	2	5	2	1	88	1	88	2	1	88	88	88	88	88	88	88	88	88	1	0	6	1	6	2	6	1	5	1.5	6	2
106	HK04-08-106	99	99	99	99	99	99	99	99	99	99	99	99	99	99	99	99	99	99	99	99	99	99	99	99	99	99	99	99	99	99	99	99	99	99	99	99	99	99	99	99	99	99	99	99	99	99	99	99
107	HK04-08-107	3	1	2	3	4	4	2	1	1	1	2	3	3	2	2	2	4	5	1	5	2	2	癌症	2	88	2	1	88	88	88	88	88	88	88	88	88	0	0	3	0.5	5	1	5	1	3	1	5	2
108	HK04-08-108	2	3	1	4	4	3	1	2	1	2	2	3	2	2	2	3	4	3	2	5	2	1	88	1	88	4	1	88	88	88	88	88	88	88	88	88	0	0	6	2	5	2	3	1	3	1	4	2
109	HK04-08-109	99	99	99	99	99	99	99	99	99	99	99	99	99	99	99	99	99	99	99	99	99	99	99	99	99	99	99	99	99	99	99	99	99	99	99	99	99	99	99	99	99	99	99	99	99	99	99	99
110	HK04-08-110	99	99	99	99	99	99	99	99	99	99	99	99	99	99	99	99	99	99	99	99	99	99	99	99	99	99	99	99	99	99	99	99	99	99	99	99	99	99	99	99	99	99	99	99	99	99	99	99
111	HK04-08-111	99	99	99	99	99	99	99	99	99	99	99	99	99	99	99	99	99	99	99	99	99	99	99	99	99	99	99	99	99	99	99	99	99	99	99	99	99	99	99	99	99	99	99	99	99	99	99	99
112	HK04-08-112	2	2	2	4	3	1	3	1	1	1	2	3	3	2	2	3	4	4	1	5	2	1	88	1	88	2	1	88	88	88	88	88	88	88	88	88	0	0	6	1	6	2	5	1	4	1	6	3
113	HK04-09-113	99	99	99	99	99	99	99	99	99	99	99	99	99	99	99	99	99	99	99	99	99	99	99	99	99	99	99	99	99	99	99	99	99	99	99	99	99	99	99	99	99	99	99	99	99	99	99	99
114	HK04-09-114	99	99	99	99	99	99	99	99	99	99	99	99	99	99	99	99	99	99	99	99	99	99	99	99	99	99	99	99	99	99	99	99	99	99	99	99	99	99	99	99	99	99	99	99	99	99	99	99
115	HK04-09-115	99	99	99	99	99	99	99	99	99	99	99	99	99	99	99	99	99	99	99	99	99	99	99	99	99	99	99	99	99	99	99	99	99	99	99	99	99	99	99	99	99	99	99	99	99	99	99	99
116	HK04-09-116	99	99	99	99	99	99	99	99	99	99	99	99	99	99	99	99	99	99	99	99	99	99	99	99	99	99	99	99	99	99	99	99	99	99	99	99	99	99	99	99	99	99	99	99	99	99	99	99
117	HK04-09-117	3	4	1	3	4	3	2	2	1	1	2	3	1	2	2	1	4	1	1	5	1	1	88	1	88	2	1	88	88	88	88	88	88	88	88	88	0	0	5	1	5	2	6	1	2	1	5	1
118	HK04-09-118	99	99	99	99	99	99	99	99	99	99	99	99	99	99	99	99	99	99	99	99	99	99	99	99	99	99	99	99	99	99	99	99	99	99	99	99	99	99	99	99	99	99	99	99	99	99	99	99
119	HK04-09-119	99	99	99	99	99	99	99	99	99	99	99	99	99	99	99	99	99	99	99	99	99	99	99	99	99	99	99	99	99	99	99	99	99	99	99	99	99	99	99	99	99	99	99	99	99	99	99	99
120	HK04-09-120	99	99	99	99	99	99	99	99	99	99	99	99	99	99	99	99	99	99	99	99	99	99	99	99	99	99	99	99	99	99	99	99	99	99	99	99	99	99	99	99	99	99	99	99	99	99	99	99
121	HK04-09-121	99	99	99	99	99	99	99	99	99	99	99	99	99	99	99	99	99	99	99	99	99	99	99	99	99	99	99	99	99	99	99	99	99	99	99	99	99	99	99	99	99	99	99	99	99	99	99	99
122	HK04-09-122	99	99	99	99	99	99	99	99	99	99	99	99	99	99	99	99	99	99	99	99	99	99	99	99	99	99	99	99	99	99	99	99	99	99	99	99	99	99	99	99	99	99	99	99	99	99	99	99
123	HK04-09-123	99	99	99	99	99	99	99	99	99	99	99	99	99	99	99	99	99	99	99	99	99	99	99	99	99	99	99	99	99	99	99	99	99	99	99	99	99	99	99	99	99	99	99	99	99	99	99	99
124	HK04-09-124	99	99	99	99	99	99	99	99	99	99	99	99	99	99	99	99	99	99	99	99	99	99	99	99	99	99	99	99	99	99	99	99	99	99	99	99	99	99	99	99	99	99	99	99	99	99	99	99
125	HK04-10-125	3	1	2	4	3	1	4	1	1	1	2	4	3	2	2	2	2	2	1	5	2	1	88	1	88	99	1	88	88	88	88	88	88	88	88	88	0	0	6	1	6	1	5	1	2	1	6	1
126	HK04-10-126	99	99	99	99	99	99	99	99	99	99	99	99	99	99	99	99	99	99	99	99	99	99	99	99	99	99	99	99	99	99	99	99	99	99	99	99	99	99	99	99	99	99	99	99	99	99	99	99
127	HK04-10-127	3	4	2	4	4	1	1	1	1	1	2	3	2	2	2	1	4	4	1	5	1	1	88	1	88	2	1	88	88	88	88	88	88	88	88	88	0	0	6	1	6	2	5	2	1	0	6	1
128	HK04-10-128	3	1	1	4	3	4	3	1	1	1	3	3	1	2	2	4	5	3	1	5	2	1	88	1	88	2	1	88	88	88	88	88	88	88	88	88	99	99	6	1	6	1	3	0.5	2	99	6	99
129	HK04-10-129	99	99	99	99	99	99	99	99	99	99	99	99	99	99	99	99	99	99	99	99	99	99	99	99	99	99	99	99	99	99	99	99	99	99	99	99	99	99	99	99	99	99	99	99	99	99	99	99
130	HK04-10-130	99	99	99	99	99	99	99	99	99	99	99	99	99	99	99	99	99	99	99	99	99	99	99	99	99	99	99	99	99	99	99	99	99	99	99	99	99	99	99	99	99	99	99	99	99	99	99	99
131	HK04-10-131	3	1	2	3	4	1	3	1	1	1	1	3	4	2	2	2	4	4	1	5	1	2	高血壓	4	血壓丸，維他命丸	2	1	88	88	88	88	88	88	88	88	88	0	0	5	1	5	2	5	1	5	1	5	2
132	HK04-10-132	99	99	99	99	99	99	99	99	99	99	99	99	99	99	99	99	99	99	99	99	99	99	99	99	99	99	99	99	99	99	99	99	99	99	99	99	99	99	99	99	99	99	99	99	99	99	99	99
133	HK04-10-133	3	1	2	3	4	4	1	1	1	2	4	3	2	2	2	3	4	4	1	5	1	2	失眠，焦慮， 抑鬱	4	安眠藥， 抗抑鬱藥	3	1	88	88	88	88	88	88	88	88	88	0	0	5	1	5	1	3	1	5	1	5	2
134	HK04-10-134	99	99	99	99	99	99	99	99	99	99	99	99	99	99	99	99	99	99	99	99	99	99	99	99	99	99	99	99	99	99	99	99	99	99	99	99	99	99	99	99	99	99	99	99	99	99	99	99
135	HK04-10-135	99	99	99	99	99	99	99	99	99	99	99	99	99	99	99	99	99	99	99	99	99	99	99	99	99	99	99	99	99	99	99	99	99	99	99	99	99	99	99	99	99	99	99	99	99	99	99	99
136	HK04-10-136	99	99	99	99	99	99	99	99	99	99	99	99	99	99	99	99	99	99	99	99	99	99	99	99	99	99	99	99	99	99	99	99	99	99	99	99	99	99	99	99	99	99	99	99	99	99	99	99
137	HK04-10-137	99	99	99	99	99	99	99	99	99	99	99	99	99	99	99	99	99	99	99	99	99	99	99	99	99	99	99	99	99	99	99	99	99	99	99	99	99	99	99	99	99	99	99	99	99	99	99	99
138	HK04-10-138	99	99	99	99	99	99	99	99	99	99	99	99	99	99	99	99	99	99	99	99	99	99	99	99	99	99	99	99	99	99	99	99	99	99	99	99	99	99	99	99	99	99	99	99	99	99	99	99
139	HK04-10-139	99	99	99	99	99	99	99	99	99	99	99	99	99	99	99	99	99	99	99	99	99	99	99	99	99	99	99	99	99	99	99	99	99	99	99	99	99	99	99	99	99	99	99	99	99	99	99	99
140	HK04-10-140	99	99	99	99	99	99	99	99	99	99	99	99	99	99	99	99	99	99	99	99	99	99	99	99	99	99	99	99	99	99	99	99	99	99	99	99	99	99	99	99	99	99	99	99	99	99	99	99
141	HK04-10-141	99	99	99	99	99	99	99	99	99	99	99	99	99	99	99	99	99	99	99	99	99	99	99	99	99	99	99	99	99	99	99	99	99	99	99	99	99	99	99	99	99	99	99	99	99	99	99	99
142	HK04-10-142	99	99	99	99	99	99	99	99	99	99	99	99	99	99	99	99	99	99	99	99	99	99	99	99	99	99	99	99	99	99	99	99	99	99	99	99	99	99	99	99	99	99	99	99	99	99	99	99
143	KL05-11-143	99	99	99	99	99	99	99	99	99	99	99	99	99	99	99	99	99	99	99	99	99	99	99	99	99	99	99	99	99	99	99	99	99	99	99	99	99	99	99	99	99	99	99	99	99	99	99	99
144	KL05-11-144	3	1	1	4	4	4	2	1	1	1	1	2	4	2	2	3	5	5	1	5	1	1	88	1	88	2	1	88	88	88	88	88	88	88	88	88	0	0	4	1	6	1-2	6	1	3	1	5	2
145	KL05-11-145	99	99	99	99	99	99	99	99	99	99	99	99	99	99	99	99	99	99	99	99	99	99	99	99	99	99	99	99	99	99	99	99	99	99	99	99	99	99	99	99	99	99	99	99	99	99	99	99
146	KL05-11-146	3	1	1	4	3	4	2	2	1	2	2	2	2	2	2	2	5	4	1	5	2	1	88	1	88	2	1	88	88	88	88	88	88	88	88	88	0	0	4	1	4	1	3	1	2	1	4	1
147	KL05-11-147	2	4	1	3	4	4	2	2	1	2	2	3	3	2	2	1	4	4	1	5	2	1	88	1	88	3	1	88	88	88	88	88	88	88	88	88	1	99	5	1	5	2	5	2	2	1	6	8
148	KL05-11-148	3	3	2	3	3	4	3	2	1	1	1	3	3	2	2	3	99	2	1	5	1	2	長期吃薄血丸	4	薄血丸	2	1	88	88	88	88	88	88	88	88	88	0	0	5	1	6	2	5	1	4	1	6	1
149	KL05-11-149	99	99	99	99	99	99	99	99	99	99	99	99	99	99	99	99	99	99	99	99	99	99	99	99	99	99	99	99	99	99	99	99	99	99	99	99	99	99	99	99	99	99	99	99	99	99	99	99
150	KL05-11-150	99	99	99	99	99	99	99	99	99	99	99	99	99	99	99	99	99	99	99	99	99	99	99	99	99	99	99	99	99	99	99	99	99	99	99	99	99	99	99	99	99	99	99	99	99	99	99	99
151	KL05-11-151	99	99	99	99	99	99	99	99	99	99	99	99	99	99	99	99	99	99	99	99	99	99	99	99	99	99	99	99	99	99	99	99	99	99	99	99	99	99	99	99	99	99	99	99	99	99	99	99
152	KL05-11-152	3	1	2	4	4	3	1	1	1	1	1	3	3	2	2	2	4	5	1	5	1	1	88	1	88	1	1	88	88	88	88	88	88	88	88	88	0	0	6	1	6	2	4	1	2	1	5	1
153	KL05-11-153	3	1	2	4	3	4	2	1	1	1	2	2	1	2	2	2	5	4	3	5	1	2	乳腺	4	三苯氧胺	2	1	88	88	88	88	88	88	88	88	88	0	0	3	1	4	1	4	1	3	1	4	1
154	KL05-11-154	99	99	99	99	99	99	99	99	99	99	99	99	99	99	99	99	99	99	99	99	99	99	99	99	99	99	99	99	99	99	99	99	99	99	99	99	99	99	99	99	99	99	99	99	99	99	99	99
155	KL05-11-155	99	99	99	99	99	99	99	99	99	99	99	99	99	99	99	99	99	99	99	99	99	99	99	99	99	99	99	99	99	99	99	99	99	99	99	99	99	99	99	99	99	99	99	99	99	99	99	99
156	KL05-11-156	2	3	1	3	4	4	4	2	1	1	4	3	5	2	2	2	1	2	1	5	2	2	雌激素過高	4	降激素	3	1	88	88	88	88	88	88	88	88	88	0	0	4	3	5	1	5	3	2	1	6	1
157	KL05-11-157	3	1	1	3	3	4	2	1	1	1	3	3	2	2	2	2	4	2	1	5	1	1	88	1	88	2	1	88	88	88	88	88	88	88	88	88	99	99	5	1	5	2	5	1	2	1	5	1
158	KL05-11-158	3	3	2	4	3	4	1	1	1	2	2	3	2	1	1	4	5	4	1	5	2	1	88	4	傷風感冒	2	1	88	88	88	88	88	88	88	88	88	0	0	6	1	6	1	3	1	2	1	6	2
159	KL05-11-159	99	99	99	99	99	99	99	99	99	99	99	99	99	99	99	99	99	99	99	99	99	99	99	99	99	99	99	99	99	99	99	99	99	99	99	99	99	99	99	99	99	99	99	99	99	99	99	99
160	KL05-11-160	3	1	1	4	4	1	2	1	1	2	2	2	4	2	2	2	5	4	1	5	2	2	breast cancer	1	88	3	1	88	88	88	88	88	88	88	88	88	0	0	7	1.5	7	2	7	1	3	1	7	4
161	KL05-11-161	3	2	1	1	2	4	3	2	1	4	2	3	3	1	2	2	4	4	1	5	1	1	88	1	88	3	1	88	88	88	88	88	88	88	88	88	0	0	4	1	6	1	4	1	2	1	4	1
162	KL05-11-162	99	99	99	99	99	99	99	99	99	99	99	99	99	99	99	99	99	99	99	99	99	99	99	99	99	99	99	99	99	99	99	99	99	99	99	99	99	99	99	99	99	99	99	99	99	99	99	99
163	KL05-11-163	99	99	99	99	99	99	99	99	99	99	99	99	99	99	99	99	99	99	99	99	99	99	99	99	99	99	99	99	99	99	99	99	99	99	99	99	99	99	99	99	99	99	99	99	99	99	99	99
164	KL05-11-164	3	3	2	4	3	4	1	1	1	2	3	5	4	1	2	3	5	2	1	5	1	1	88	1	88	2	1	88	88	88	88	88	88	88	88	88	0.5	99	3	0.5	6	1	3	1	2	1	6	2
165	KL05-11-165	2	4	1	3	4	3	2	1	1	1	2	2	3	2	2	1	4	4	1	5	1	2	高血壓	4	血壓藥	3	1	88	88	88	88	88	88	88	88	88	0.5	99	5	1	5	1	5	1	2	0.5	5	4
166	KL05-12-166	3	3	2	4	4	4	1	1	1	1	2	3	3	2	2	3	3	3	1	5	1	1	88	1	88	2	1	88	88	88	88	88	88	88	88	88	0	0	6	1	5	1	3	2	2	0.5	3	2
167	KL05-12-167	3	1	1	1	1	1	2	2	1	1	1	3	1	2	2	1	1	4	1	5	1	1	88	1	88	2	2	1	0	0	1	0	0	0	1	牛肉	2	0	4	1	5	1	5	1	3	1	5	2
168	KL05-12-168	3	1	2	4	1	4	1	1	1	1	3	3	2	2	2	4	4	4	1	5	1	1	88	1	88	2	1	88	88	88	88	88	88	88	88	88	0	0	6	2	4	1	3	0.5	2	1	3	2
169	KL05-12-169	2	1	2	4	4	3	2	2	1	1	1	3	1	2	2	2	4	4	1	5	1	1	88	1	88	3	1	88	88	88	88	88	88	88	88	88	1	99	6	1	6	5	4	1	4	1	6	2
170	KL05-12-170	3	1	2	3	4	4	3	1	3	2	2	4	3	2	2	3	2	3	1	5	2	2	高血壓	4	降壓藥	2	1	88	88	88	88	88	88	88	88	88	1	99	3	1	6	1	3	1	2	1	5	5
171	KL05-12-171	99	99	99	99	99	99	99	99	99	99	99	99	99	99	99	99	99	99	99	99	99	99	99	99	99	99	99	99	99	99	99	99	99	99	99	99	99	99	99	99	99	99	99	99	99	99	99	99
172	KL05-12-172	99	99	99	99	99	99	99	99	99	99	99	99	99	99	99	99	99	99	99	99	99	99	99	99	99	99	99	99	99	99	99	99	99	99	99	99	99	99	99	99	99	99	99	99	99	99	99	99
173	KL05-12-173	3	4	2	3	4	4	2	1	1	2	2	3	2	2	2	5	5	5	4	5	1	1	88	1	88	2	1	88	88	88	88	88	88	88	88	88	0	0	3	1	3	1	2	1	1	0	3	2
174	KL05-12-174	99	99	99	99	99	99	99	99	99	99	99	99	99	99	99	99	99	99	99	99	99	99	99	99	99	99	99	99	99	99	99	99	99	99	99	99	99	99	99	99	99	99	99	99	99	99	99	99
175	KL06-13-175	99	99	99	99	99	99	99	99	99	99	99	99	99	99	99	99	99	99	99	99	99	99	99	99	99	99	99	99	99	99	99	99	99	99	99	99	99	99	99	99	99	99	99	99	99	99	99	99
176	KL06-13-176	99	99	99	99	99	99	99	99	99	99	99	99	99	99	99	99	99	99	99	99	99	99	99	99	99	99	99	99	99	99	99	99	99	99	99	99	99	99	99	99	99	99	99	99	99	99	99	99
177	KL06-13-177	99	99	99	99	99	99	99	99	99	99	99	99	99	99	99	99	99	99	99	99	99	99	99	99	99	99	99	99	99	99	99	99	99	99	99	99	99	99	99	99	99	99	99	99	99	99	99	99
178	KL06-13-178	99	99	99	99	99	99	99	99	99	99	99	99	99	99	99	99	99	99	99	99	99	99	99	99	99	99	99	99	99	99	99	99	99	99	99	99	99	99	99	99	99	99	99	99	99	99	99	99
179	KL06-13-179	99	99	99	99	99	99	99	99	99	99	99	99	99	99	99	99	99	99	99	99	99	99	99	99	99	99	99	99	99	99	99	99	99	99	99	99	99	99	99	99	99	99	99	99	99	99	99	99
180	KL06-13-180	99	99	99	99	99	99	99	99	99	99	99	99	99	99	99	99	99	99	99	99	99	99	99	99	99	99	99	99	99	99	99	99	99	99	99	99	99	99	99	99	99	99	99	99	99	99	99	99
181	KL06-13-181	99	99	99	99	99	99	99	99	99	99	99	99	99	99	99	99	99	99	99	99	99	99	99	99	99	99	99	99	99	99	99	99	99	99	99	99	99	99	99	99	99	99	99	99	99	99	99	99
182	KL06-13-182	99	99	99	99	99	99	99	99	99	99	99	99	99	99	99	99	99	99	99	99	99	99	99	99	99	99	99	99	99	99	99	99	99	99	99	99	99	99	99	99	99	99	99	99	99	99	99	99
183	KL06-13-183	99	99	99	99	99	99	99	99	99	99	99	99	99	99	99	99	99	99	99	99	99	99	99	99	99	99	99	99	99	99	99	99	99	99	99	99	99	99	99	99	99	99	99	99	99	99	99	99
184	KL06-13-184	3	1	1	3	1	3	2	1	1	1	3	3	3	2	2	2	4	3	3	5	2	1	88	4	中藥	4	2	0	0	0	0	1	0	0	0		1	100	5	1	4	1	3	1	3	1	5	4
185	KL06-13-185	99	99	99	99	99	99	99	99	99	99	99	99	99	99	99	99	99	99	99	99	99	99	99	99	99	99	99	99	99	99	99	99	99	99	99	99	99	99	99	99	99	99	99	99	99	99	99	99
186	KL06-13-186	99	99	99	99	99	99	99	99	99	99	99	99	99	99	99	99	99	99	99	99	99	99	99	99	99	99	99	99	99	99	99	99	99	99	99	99	99	99	99	99	99	99	99	99	99	99	99	99
187	KL06-13-187	3	4	2	4	4	1	2	1	1	1	2	4	4	2	2	3	5	5	1	5	1	1	88	1	88	3	1	88	88	88	88	88	88	88	88	88	0	0	6	1	5	1	4	1	2	1	5	1
188	KL06-13-188	99	99	99	99	99	99	99	99	99	99	99	99	99	99	99	99	99	99	99	99	99	99	99	99	99	99	99	99	99	99	99	99	99	99	99	99	99	99	99	99	99	99	99	99	99	99	99	99
189	KL06-13-189	99	99	99	99	99	99	99	99	99	99	99	99	99	99	99	99	99	99	99	99	99	99	99	99	99	99	99	99	99	99	99	99	99	99	99	99	99	99	99	99	99	99	99	99	99	99	99	99
190	KL06-13-190	99	99	99	99	99	99	99	99	99	99	99	99	99	99	99	99	99	99	99	99	99	99	99	99	99	99	99	99	99	99	99	99	99	99	99	99	99	99	99	99	99	99	99	99	99	99	99	99
191	KL06-13-191	99	99	99	99	99	99	99	99	99	99	99	99	99	99	99	99	99	99	99	99	99	99	99	99	99	99	99	99	99	99	99	99	99	99	99	99	99	99	99	99	99	99	99	99	99	99	99	99
192	KL06-13-192	99	99	99	99	99	99	99	99	99	99	99	99	99	99	99	99	99	99	99	99	99	99	99	99	99	99	99	99	99	99	99	99	99	99	99	99	99	99	99	99	99	99	99	99	99	99	99	99
193	KL06-13-193	99	99	99	99	99	99	99	99	99	99	99	99	99	99	99	99	99	99	99	99	99	99	99	99	99	99	99	99	99	99	99	99	99	99	99	99	99	99	99	99	99	99	99	99	99	99	99	99
194	KL06-13-194	99	99	99	99	99	99	99	99	99	99	99	99	99	99	99	99	99	99	99	99	99	99	99	99	99	99	99	99	99	99	99	99	99	99	99	99	99	99	99	99	99	99	99	99	99	99	99	99
195	KL06-13-195	99	99	99	99	99	99	99	99	99	99	99	99	99	99	99	99	99	99	99	99	99	99	99	99	99	99	99	99	99	99	99	99	99	99	99	99	99	99	99	99	99	99	99	99	99	99	99	99
196	KL06-13-196	99	99	99	99	99	99	99	99	99	99	99	99	99	99	99	99	99	99	99	99	99	99	99	99	99	99	99	99	99	99	99	99	99	99	99	99	99	99	99	99	99	99	99	99	99	99	99	99
197	KL06-14-197	99	99	99	99	99	99	99	99	99	99	99	99	99	99	99	99	99	99	99	99	99	99	99	99	99	99	99	99	99	99	99	99	99	99	99	99	99	99	99	99	99	99	99	99	99	99	99	99
198	KL06-14-198	99	99	99	99	99	99	99	99	99	99	99	99	99	99	99	99	99	99	99	99	99	99	99	99	99	99	99	99	99	99	99	99	99	99	99	99	99	99	99	99	99	99	99	99	99	99	99	99
199	KL06-14-199	99	99	99	99	99	99	99	99	99	99	99	99	99	99	99	99	99	99	99	99	99	99	99	99	99	99	99	99	99	99	99	99	99	99	99	99	99	99	99	99	99	99	99	99	99	99	99	99
200	KL06-14-200	2	2	2	4	4	4	1	1	1	1	2	2	1	2	2	4	4	4	1	5	1	1	88	4	感冒藥	2	1	88	88	88	88	88	88	88	88	88	0	0	4	1	6	2-3	4	1	3	1	4	2
201	KL06-14-201	3	4	1	4	4	4	2	2	1	2	4	3	1	2	2	1	5	4	1	5	1	1	88	1	88	3	2	1	0	0	0	0	0	0	0		2	99	6	1	6	2	5	1	1	0	6	3
202	KL06-14-202	3	1	1	4	4	1	3	1	1	1	2	3	2	2	2	3	4	4	2	5	2	1	88	4	頭痛藥	2	1	88	88	88	88	88	88	88	88	88	0	0	6	1	3	2	5	1	2	0.25	4	3
203	KL06-14-203	99	99	99	99	99	99	99	99	99	99	99	99	99	99	99	99	99	99	99	99	99	99	99	99	99	99	99	99	99	99	99	99	99	99	99	99	99	99	99	99	99	99	99	99	99	99	99	99
204	KL06-14-204	2	1	2	4	4	4	2	1	1	1	2	3	3	2	2	3	4	4	2	5	2	1	88	1	88	3	1	88	88	88	88	88	88	88	88	88	1	99	6	1	5	1	2	1	2	1	5	1
205	KL06-14-205	99	99	99	99	99	99	99	99	99	99	99	99	99	99	99	99	99	99	99	99	99	99	99	99	99	99	99	99	99	99	99	99	99	99	99	99	99	99	99	99	99	99	99	99	99	99	99	99
206	KL06-14-206	3	1	1	3	1	1	2	1	1	1	2	3	2	1	1	1	2	1	1	5	2	1	88	1	88	3	1	88	88	88	88	88	88	88	88	88	2	99	3	1	5	2	6	1	1	0	6	1
207	KL06-14-207	99	99	99	99	99	99	99	99	99	99	99	99	99	99	99	99	99	99	99	99	99	99	99	99	99	99	99	99	99	99	99	99	99	99	99	99	99	99	99	99	99	99	99	99	99	99	99	99
208	KL06-14-208	99	99	99	99	99	99	99	99	99	99	99	99	99	99	99	99	99	99	99	99	99	99	99	99	99	99	99	99	99	99	99	99	99	99	99	99	99	99	99	99	99	99	99	99	99	99	99	99
209	KL06-14-209	3	3	2	4	4	4	1	1	1	1	2	3	3	2	2	4	4	4	1	5	2	1	88	1	88	2	1	88	88	88	88	88	88	88	88	88	2	99	6	1	5	1	3	1	3	1	6	1
210	KL06-14-210	99	99	99	99	99	99	99	99	99	99	99	99	99	99	99	99	99	99	99	99	99	99	99	99	99	99	99	99	99	99	99	99	99	99	99	99	99	99	99	99	99	99	99	99	99	99	99	99
211	KL06-14-211	3	1	1	4	2	3	1	1	1	2	2	3	3	2	2	4	2	4	1	5	2	1	88	4	感冒成藥	3	1	88	88	88	88	88	88	88	88	88	0	0	5	1	5	1	3	1	2	1	5	3
212	KL06-15-212	3	1	1	3	3	4	1	2	1	1	2	3	3	2	2	1	5	4	1	5	2	1	88	1	88	3	1	88	88	88	88	88	88	88	88	88	2/7	0	6	1	6	2	5	1	5	1	5	4
213	KL06-15-213	99	99	99	99	99	99	99	99	99	99	99	99	99	99	99	99	99	99	99	99	99	99	99	99	99	99	99	99	99	99	99	99	99	99	99	99	99	99	99	99	99	99	99	99	99	99	99	99
214	KL06-15-214	3	1	2	1	4	2	1	2	1	1	1	2	1	2	2	3	5	5	1	5	1	1	88	1	88	3	1	88	88	88	88	88	88	88	88	88	0	0	6	1	5	2	5	1	2	1	6	3
215	KL06-15-215	3	1	1	4	4	4	1	1	1	1	2	2	1	2	2	4	5	5	1	5	1	1	88	4	感冒藥	3	1	88	88	88	88	88	88	88	88	88	0	0	6	1	5	1	5	1	2	0	5	2
216	KL06-15-216	99	99	99	99	99	99	99	99	99	99	99	99	99	99	99	99	99	99	99	99	99	99	99	99	99	99	99	99	99	99	99	99	99	99	99	99	99	99	99	99	99	99	99	99	99	99	99	99
217	KL06-15-217	99	99	99	99	99	99	99	99	99	99	99	99	99	99	99	99	99	99	99	99	99	99	99	99	99	99	99	99	99	99	99	99	99	99	99	99	99	99	99	99	99	99	99	99	99	99	99	99
218	KL06-15-218	99	99	99	99	99	99	99	99	99	99	99	99	99	99	99	99	99	99	99	99	99	99	99	99	99	99	99	99	99	99	99	99	99	99	99	99	99	99	99	99	99	99	99	99	99	99	99	99
219	KL06-15-219	99	99	99	99	99	99	99	99	99	99	99	99	99	99	99	99	99	99	99	99	99	99	99	99	99	99	99	99	99	99	99	99	99	99	99	99	99	99	99	99	99	99	99	99	99	99	99	99
220	KL06-15-220	3	1	2	3	4	3	2	1	1	1	2	3	2	2	2	1	5	1	1	5	2	1	88	4	胃藥	2	1	88	88	88	88	88	88	88	88	88	0	0	6	1	5	1	6	2	2	0.5	4	2
221	KL06-15-221	99	99	99	99	99	99	99	99	99	99	99	99	99	99	99	99	99	99	99	99	99	99	99	99	99	99	99	99	99	99	99	99	99	99	99	99	99	99	99	99	99	99	99	99	99	99	99	99
222	KL06-15-222	3	1	1	4	4	1	2	1	1	1	2	2	2	2	2	4	5	4	1	5	1	1	88	1	88	4	1	88	88	88	88	88	88	88	88	88	0	0	6	1	5	2	5	1	2	1	6	2
223	KL06-15-223	99	99	99	99	99	99	99	99	99	99	99	99	99	99	99	99	99	99	99	99	99	99	99	99	99	99	99	99	99	99	99	99	99	99	99	99	99	99	99	99	99	99	99	99	99	99	99	99
224	KL06-15-224	99	99	99	99	99	99	99	99	99	99	99	99	99	99	99	99	99	99	99	99	99	99	99	99	99	99	99	99	99	99	99	99	99	99	99	99	99	99	99	99	99	99	99	99	99	99	99	99
225	KL06-15-225	3	1	2	3	4	3	2	1	1	2	2	3	2	2	2	2	4	4	1	5	1	1	88	1	88	2	1	88	88	88	88	88	88	88	88	88	0.5	30	6	1	4	1	4	1	2	1	6	4
226	KL06-15-226	3	1	2	4	4	3	2	1	1	2	2	3	1	2	2	2	5	5	1	5	2	2	失語症	4	中藥	2	1	88	88	88	88	88	88	88	88	88	0	0	6	1	4	1	5	1	3	1	6	1
227	KL06-15-227	99	99	99	99	99	99	99	99	99	99	99	99	99	99	99	99	99	99	99	99	99	99	99	99	99	99	99	99	99	99	99	99	99	99	99	99	99	99	99	99	99	99	99	99	99	99	99	99
228	KL06-15-228	99	99	99	99	99	99	99	99	99	99	99	99	99	99	99	99	99	99	99	99	99	99	99	99	99	99	99	99	99	99	99	99	99	99	99	99	99	99	99	99	99	99	99	99	99	99	99	99
229	KL06-15-229	99	99	99	99	99	99	99	99	99	99	99	99	99	99	99	99	99	99	99	99	99	99	99	99	99	99	99	99	99	99	99	99	99	99	99	99	99	99	99	99	99	99	99	99	99	99	99	99
230	KL06-15-230	99	99	99	99	99	99	99	99	99	99	99	99	99	99	99	99	99	99	99	99	99	99	99	99	99	99	99	99	99	99	99	99	99	99	99	99	99	99	99	99	99	99	99	99	99	99	99	99
231	KL06-15-231	99	99	99	99	99	99	99	99	99	99	99	99	99	99	99	99	99	99	99	99	99	99	99	99	99	99	99	99	99	99	99	99	99	99	99	99	99	99	99	99	99	99	99	99	99	99	99	99
232	KL06-15-232	99	99	99	99	99	99	99	99	99	99	99	99	99	99	99	99	99	99	99	99	99	99	99	99	99	99	99	99	99	99	99	99	99	99	99	99	99	99	99	99	99	99	99	99	99	99	99	99
233	KL06-15-233	99	99	99	99	99	99	99	99	99	99	99	99	99	99	99	99	99	99	99	99	99	99	99	99	99	99	99	99	99	99	99	99	99	99	99	99	99	99	99	99	99	99	99	99	99	99	99	99
234	KL06-15-234	3	1	2	4	4	1	3	2	1	1	2	2	1	2	2	3	5	5	1	1	2	2	鼻炎、哮喘。	2	88	2	2	0	0	0	0	0	1	0	0		0	0	6	1	6	1	4	1	2	1	5	2
235	KL06-15-235	99	99	99	99	99	99	99	99	99	99	99	99	99	99	99	99	99	99	99	99	99	99	99	99	99	99	99	99	99	99	99	99	99	99	99	99	99	99	99	99	99	99	99	99	99	99	99	99
236	KL06-15-236	99	99	99	99	99	99	99	99	99	99	99	99	99	99	99	99	99	99	99	99	99	99	99	99	99	99	99	99	99	99	99	99	99	99	99	99	99	99	99	99	99	99	99	99	99	99	99	99
237	KL06-15-237	99	99	99	99	99	99	99	99	99	99	99	99	99	99	99	99	99	99	99	99	99	99	99	99	99	99	99	99	99	99	99	99	99	99	99	99	99	99	99	99	99	99	99	99	99	99	99	99
238	KL06-15-238	99	99	99	99	99	99	99	99	99	99	99	99	99	99	99	99	99	99	99	99	99	99	99	99	99	99	99	99	99	99	99	99	99	99	99	99	99	99	99	99	99	99	99	99	99	99	99	99
239	KL06-15-239	3	1	2	4	4	4	3	1	1	1	3	3	3	2	2	3	5	2	1	5	2	1	88	2	88	2	2	0	0	0	0	0	0	0	1	草	0	0	6	1	6	1	4	1	3	1	6	2
240	KL07-16-240	99	99	99	99	99	99	99	99	99	99	99	99	99	99	99	99	99	99	99	99	99	99	99	99	99	99	99	99	99	99	99	99	99	99	99	99	99	99	99	99	99	99	99	99	99	99	99	99
241	KL07-16-241	2	3	2	4	4	4	1	1	1	1	2	2	4	2	2	1	4	5	2	5	1	1	88	1	88	2	1	88	88	88	88	88	88	88	88	88	0	0	7	1	6	1	5	1	3	1	6	2
242	KL07-16-242	99	99	99	99	99	99	99	99	99	99	99	99	99	99	99	99	99	99	99	99	99	99	99	99	99	99	99	99	99	99	99	99	99	99	99	99	99	99	99	99	99	99	99	99	99	99	99	99
243	KL07-16-243	99	99	99	99	99	99	99	99	99	99	99	99	99	99	99	99	99	99	99	99	99	99	99	99	99	99	99	99	99	99	99	99	99	99	99	99	99	99	99	99	99	99	99	99	99	99	99	99
244	KL07-16-244	99	99	99	99	99	99	99	99	99	99	99	99	99	99	99	99	99	99	99	99	99	99	99	99	99	99	99	99	99	99	99	99	99	99	99	99	99	99	99	99	99	99	99	99	99	99	99	99
245	KL07-16-245	99	99	99	99	99	99	99	99	99	99	99	99	99	99	99	99	99	99	99	99	99	99	99	99	99	99	99	99	99	99	99	99	99	99	99	99	99	99	99	99	99	99	99	99	99	99	99	99
246	KL07-16-246	99	99	99	99	99	99	99	99	99	99	99	99	99	99	99	99	99	99	99	99	99	99	99	99	99	99	99	99	99	99	99	99	99	99	99	99	99	99	99	99	99	99	99	99	99	99	99	99
247	KL07-16-247	99	99	99	99	99	99	99	99	99	99	99	99	99	99	99	99	99	99	99	99	99	99	99	99	99	99	99	99	99	99	99	99	99	99	99	99	99	99	99	99	99	99	99	99	99	99	99	99
248	KL07-16-248	99	99	99	99	99	99	99	99	99	99	99	99	99	99	99	99	99	99	99	99	99	99	99	99	99	99	99	99	99	99	99	99	99	99	99	99	99	99	99	99	99	99	99	99	99	99	99	99
249	KL07-16-249	99	99	99	99	99	99	99	99	99	99	99	99	99	99	99	99	99	99	99	99	99	99	99	99	99	99	99	99	99	99	99	99	99	99	99	99	99	99	99	99	99	99	99	99	99	99	99	99
250	KL07-16-250	3	1	1	3	4	2	1	2	1	1	3	3	4	2	2	3	2	5	1	3	1	2	胃、肚、腸、骨	2	88	4	1	88	88	88	88	88	88	88	88	88	1	99	6	1	5	2	3	1	3	1	6	4
251	KL07-16-251	99	99	99	99	99	99	99	99	99	99	99	99	99	99	99	99	99	99	99	99	99	99	99	99	99	99	99	99	99	99	99	99	99	99	99	99	99	99	99	99	99	99	99	99	99	99	99	99
252	KL07-16-252	99	99	99	99	99	99	99	99	99	99	99	99	99	99	99	99	99	99	99	99	99	99	99	99	99	99	99	99	99	99	99	99	99	99	99	99	99	99	99	99	99	99	99	99	99	99	99	99
253	KL07-16-253	99	99	99	99	99	99	99	99	99	99	99	99	99	99	99	99	99	99	99	99	99	99	99	99	99	99	99	99	99	99	99	99	99	99	99	99	99	99	99	99	99	99	99	99	99	99	99	99
254	KL08-17-254	99	99	99	99	99	99	99	99	99	99	99	99	99	99	99	99	99	99	99	99	99	99	99	99	99	99	99	99	99	99	99	99	99	99	99	99	99	99	99	99	99	99	99	99	99	99	99	99
255	KL08-17-255	3	1	2	4	4	2	1	1	1	2	3	3	3	1	2	2	2	2	2	5	2	1	88	1	88	2	1	88	88	88	88	88	88	88	88	88	1	0	6	2	6	2	5	1	1	0	5	3
256	KL08-17-256	99	99	99	99	99	99	99	99	99	99	99	99	99	99	99	99	99	99	99	99	99	99	99	99	99	99	99	99	99	99	99	99	99	99	99	99	99	99	99	99	99	99	99	99	99	99	99	99
257	KL08-17-257	3	1	2	4	4	3	1	1	1	1	1	3	2	2	2	3	5	4	2	5	1	1	88	1	88	3	1	88	88	88	88	88	88	88	88	88	8	100	7	1	7	1	6	0.5	1	0	3	2
258	KL08-17-258	99	99	99	99	99	99	99	99	99	99	99	99	99	99	99	99	99	99	99	99	99	99	99	99	99	99	99	99	99	99	99	99	99	99	99	99	99	99	99	99	99	99	99	99	99	99	99	99
259	KL08-17-259	3	1	1	4	1	1	1	1	1	1	2	4	3	2	2	2	5	4	1	5	2	2	心漏癥	4	感冒藥、止痛退燒、咳嗽水	2	1	88	88	88	88	88	88	88	88	88	1	99	5	1	5	1	5	1	5	1	2	1
260	KL08-17-260	3	3	1	4	3	4	2	1	4	2	2	4	1	2	2	2	99	3	1	5	2	2	類風濕關節炎	1	88	3	2	0	0	0	1	1	0	0	1	西蘭花、芒果	2	0	4	2	6	2	3	1	3	1	4	5
261	KL08-17-261	99	99	99	99	99	99	99	99	99	99	99	99	99	99	99	99	99	99	99	99	99	99	99	99	99	99	99	99	99	99	99	99	99	99	99	99	99	99	99	99	99	99	99	99	99	99	99	99
262	KL08-17-262	99	99	99	99	99	99	99	99	99	99	99	99	99	99	99	99	99	99	99	99	99	99	99	99	99	99	99	99	99	99	99	99	99	99	99	99	99	99	99	99	99	99	99	99	99	99	99	99
263	KL08-17-263	3	1	1	4	4	4	2	1	1	1	2	5	5	2	2	2	3	2	1	5	2	2	牙周炎和肝火旺	1	88	2	2	1	0	0	0	0	0	0	0		0	0	6	0.5	6	3	5	1	1	0	6	1
264	KL08-17-264	3	1	1	3	4	3	3	2	1	1	3	1	1	2	2	2	5	4	1	5	1	2	高血壓	4	血壓藥	2	2	0	0	1	0	0	0	0	0		6	80	6	1	5	1	4	1	2	0.75	6	2-3
265	KL08-17-265	99	99	99	99	99	99	99	99	99	99	99	99	99	99	99	99	99	99	99	99	99	99	99	99	99	99	99	99	99	99	99	99	99	99	99	99	99	99	99	99	99	99	99	99	99	99	99	99
266	KL08-17-266	99	99	99	99	99	99	99	99	99	99	99	99	99	99	99	99	99	99	99	99	99	99	99	99	99	99	99	99	99	99	99	99	99	99	99	99	99	99	99	99	99	99	99	99	99	99	99	99
267	KL08-17-267	99	99	99	99	99	99	99	99	99	99	99	99	99	99	99	99	99	99	99	99	99	99	99	99	99	99	99	99	99	99	99	99	99	99	99	99	99	99	99	99	99	99	99	99	99	99	99	99
268	KL08-17-268	3	2	1	4	4	4	1	1	1	1	3	3	1	2	2	5	5	5	1	5	1	1	88	1	88	2	1	88	88	88	88	88	88	88	88	88	99	99	4	1	3	1	3	99	3	1	3	1
269	KL08-17-269	2	1	2	4	4	4	1	1	1	1	2	3	3	2	2	4	4	4	2	5	1	1	88	1	88	2	2	1	0	0	0	1	0	0	0		0	0	6	1	6	1	3	1	2	1	6	2
270	KL08-17-270	99	99	99	99	99	99	99	99	99	99	99	99	99	99	99	99	99	99	99	99	99	99	99	99	99	99	99	99	99	99	99	99	99	99	99	99	99	99	99	99	99	99	99	99	99	99	99	99
271	KL08-17-271	99	99	99	99	99	99	99	99	99	99	99	99	99	99	99	99	99	99	99	99	99	99	99	99	99	99	99	99	99	99	99	99	99	99	99	99	99	99	99	99	99	99	99	99	99	99	99	99
272	KL08-18-272	3	1	1	3	4	1	1	2	1	1	2	2	1	2	2	2	5	4	1	4	1	1	88	1	88	2	2	0	0	0	0	0	1	0	0		0	0	6	1	5	1	5	1	3	1	5	1
273	KL08-18-273	99	99	99	99	99	99	99	99	99	99	99	99	99	99	99	99	99	99	99	99	99	99	99	99	99	99	99	99	99	99	99	99	99	99	99	99	99	99	99	99	99	99	99	99	99	99	99	99
274	KL08-18-274	2	1	1	4	4	4	1	1	1	1	2	3	1	2	2	2	2	2	1	5	1	1	88	1	88	4	1	88	88	88	88	88	88	88	88	88	0	0	3	2	5	1	3	1	2	1	6	1
275	KL08-18-275	99	99	99	99	99	99	99	99	99	99	99	99	99	99	99	99	99	99	99	99	99	99	99	99	99	99	99	99	99	99	99	99	99	99	99	99	99	99	99	99	99	99	99	99	99	99	99	99
276	KL08-18-276	3	1	2	4	4	4	4	1	1	1	1	3	2	2	2	1	5	5	1	5	1	1	88	1	88	2	1	88	88	88	88	88	88	88	88	88	0	0	6	1	5	1	6	1	2	1	6	1
277	KL08-18-277	99	99	99	99	99	99	99	99	99	99	99	99	99	99	99	99	99	99	99	99	99	99	99	99	99	99	99	99	99	99	99	99	99	99	99	99	99	99	99	99	99	99	99	99	99	99	99	99
278	KL08-18-278	3	3	1	4	3	4	2	2	1	1	2	3	4	1	2	1	5	2	1	5	2	1	88	4	必理痛	3	1	88	88	88	88	88	88	88	88	88	0.5	99	6	1-2	6	1-2	5	1	5	1	6	1
279	KL08-18-279	2	1	2	4	4	4	1	2	1	1	3	2	2	2	2	1	3	3	2	5	2	1	88	1	88	4	1	88	88	88	88	88	88	88	88	88	0	0	5	1	5	1-2	5	2	5	1	4	2-3
280	KL08-18-280	3	3	1	3	4	3	2	1	1	2	3	3	3	2	2	3	3	2	1	5	2	2	慢性咽喉炎	2	88	3	1	88	88	88	88	88	88	88	88	88	0	0	4	1	4	1	4	1	1	0	3	1
281	KL08-18-281	3	1	2	4	4	4	1	1	1	2	1	4	2	2	2	2	5	1	4	5	1	1	88	1	88	2	1	88	88	88	88	88	88	88	88	88	0	0	6	1	5	1	3	1	2	1	5	1
282	KL08-18-282	3	3	2	3	4	4	3	1	1	1	2	3	2	1	2	2	4	4	1	5	1	1	88	1	88	2	1	88	88	88	88	88	88	88	88	88	0	0	6	1	6	1	5	1	1	0	6	2
283	KL08-18-283	99	99	99	99	99	99	99	99	99	99	99	99	99	99	99	99	99	99	99	99	99	99	99	99	99	99	99	99	99	99	99	99	99	99	99	99	99	99	99	99	99	99	99	99	99	99	99	99
284	KL08-18-284	99	99	99	99	99	99	99	99	99	99	99	99	99	99	99	99	99	99	99	99	99	99	99	99	99	99	99	99	99	99	99	99	99	99	99	99	99	99	99	99	99	99	99	99	99	99	99	99
285	KL08-18-285	99	99	99	99	99	99	99	99	99	99	99	99	99	99	99	99	99	99	99	99	99	99	99	99	99	99	99	99	99	99	99	99	99	99	99	99	99	99	99	99	99	99	99	99	99	99	99	99
286	KL08-18-286	3	3	2	4	3	4	4	1	1	1	3	4	4	2	2	3	3	1	1	5	2	1	88	1	88	2	1	88	88	88	88	88	88	88	88	88	0	0	6	1	6	1	2	1	1	0	3	1
287	KL08-18-287	3	1	2	4	4	3	2	1	1	1	2	3	2	2	2	3	5	4	1	5	1	1	88	1	88	3	1	88	88	88	88	88	88	88	88	88	0	0	6	1	6	3	3	1	2	1	5	2
288	KL08-18-288	99	99	99	99	99	99	99	99	99	99	99	99	99	99	99	99	99	99	99	99	99	99	99	99	99	99	99	99	99	99	99	99	99	99	99	99	99	99	99	99	99	99	99	99	99	99	99	99
289	KL08-18-289	99	99	99	99	99	99	99	99	99	99	99	99	99	99	99	99	99	99	99	99	99	99	99	99	99	99	99	99	99	99	99	99	99	99	99	99	99	99	99	99	99	99	99	99	99	99	99	99
290	KL08-18-290	99	99	99	99	99	99	99	99	99	99	99	99	99	99	99	99	99	99	99	99	99	99	99	99	99	99	99	99	99	99	99	99	99	99	99	99	99	99	99	99	99	99	99	99	99	99	99	99
291	KL08-18-291	99	99	99	99	99	99	99	99	99	99	99	99	99	99	99	99	99	99	99	99	99	99	99	99	99	99	99	99	99	99	99	99	99	99	99	99	99	99	99	99	99	99	99	99	99	99	99	99
292	KL08-19-292	99	99	99	99	99	99	99	99	99	99	99	99	99	99	99	99	99	99	99	99	99	99	99	99	99	99	99	99	99	99	99	99	99	99	99	99	99	99	99	99	99	99	99	99	99	99	99	99
293	KL08-19-293	3	3	2	4	4	4	2	1	1	1	1	3	2	2	2	3	5	4	1	5	1	1	88	1	88	2	1	88	88	88	88	88	88	88	88	88	6	99	6	1	6	2	5	1	3	1	5	2
294	KL08-19-294	3	3	2	4	2	1	1	1	1	2	3	5	4	2	2	4	5	5	1	5	2	2	鼻敏感，氣管問題	4	血壓藥	3	1	88	88	88	88	88	88	88	88	88	1	99	6	1	6	1	3	0.5	5	1	6	2
295	KL08-19-295	3	3	1	3	3	3	2	2	1	2	2	2	1	2	2	2	3	2	1	5	1	2	膽管石	1	88	2	1	88	88	88	88	88	88	88	88	88	0	0	3	1	6	2	3	0.5	3	1	6	2
296	KL08-19-296	2	3	1	4	4	4	1	1	1	1	2	3	3	2	2	4	5	2	1	5	1	1	88	1	88	2	1	88	88	88	88	88	88	88	88	88	0	0	6	2	4	2	2	1	2	1	5	2
297	KL08-19-297	3	1	1	3	4	4	1	1	1	2	1	3	1	2	2	2	5	5	1	5	1	1	88	1	88	1	1	88	88	88	88	88	88	88	88	88	99	99	5	1	6	2	5	1	2	1	5	1
298	KL08-19-298	2	1	1	3	3	3	2	2	1	2	2	3	2	2	2	1	4	4	2	5	1	1	88	1	88	3	1	88	88	88	88	88	88	88	88	88	1	99	6	1	6	1	5	1	3	1	6	2
299	KL08-19-299	3	1	2	4	4	4	1	1	1	1	2	3	2	2	2	3	4	4	1	5	1	1	88	1	88	3	1	88	88	88	88	88	88	88	88	88	0	0	5	1	5	1	3	1	1	0	3	3
300	KL09-20-300	2	3	2	4	4	4	3	2	1	2	2	3	1	2	2	1	5	5	1	5	1	2	內風濕關節炎	2	88	2	1	88	88	88	88	88	88	88	88	88	0	0	2	1	6	2	4	99	99	99	99	99
301	KL09-20-301	3	3	2	3	4	3	2	1	1	1	2	4	3	2	2	3	5	4	1	5	1	1	88	1	88	2	1	88	88	88	88	88	88	88	88	88	4	90	6	1	6	1	4	1	3	1	4	1
302	KL09-20-302	99	99	99	99	99	99	99	99	99	99	99	99	99	99	99	99	99	99	99	99	99	99	99	99	99	99	99	99	99	99	99	99	99	99	99	99	99	99	99	99	99	99	99	99	99	99	99	99
303	KL09-20-303	99	99	99	99	99	99	99	99	99	99	99	99	99	99	99	99	99	99	99	99	99	99	99	99	99	99	99	99	99	99	99	99	99	99	99	99	99	99	99	99	99	99	99	99	99	99	99	99
304	KL09-20-304	99	99	99	99	99	99	99	99	99	99	99	99	99	99	99	99	99	99	99	99	99	99	99	99	99	99	99	99	99	99	99	99	99	99	99	99	99	99	99	99	99	99	99	99	99	99	99	99
305	KL09-20-305	99	99	99	99	99	99	99	99	99	99	99	99	99	99	99	99	99	99	99	99	99	99	99	99	99	99	99	99	99	99	99	99	99	99	99	99	99	99	99	99	99	99	99	99	99	99	99	99
306	KL09-20-306	3	1	1	3	3	1	2	1	1	2	2	2	4	2	2	3	3	4	1	5	1	1	88	4	傷風成藥	2	2	0	0	0	0	0	1	0	0		0	0	6	1	6	0.5	5	1	4	1	6	2
307	KL09-20-307	99	99	99	99	99	99	99	99	99	99	99	99	99	99	99	99	99	99	99	99	99	99	99	99	99	99	99	99	99	99	99	99	99	99	99	99	99	99	99	99	99	99	99	99	99	99	99	99
308	KL09-20-308	99	99	99	99	99	99	99	99	99	99	99	99	99	99	99	99	99	99	99	99	99	99	99	99	99	99	99	99	99	99	99	99	99	99	99	99	99	99	99	99	99	99	99	99	99	99	99	99
309	KL09-20-309	99	99	99	99	99	99	99	99	99	99	99	99	99	99	99	99	99	99	99	99	99	99	99	99	99	99	99	99	99	99	99	99	99	99	99	99	99	99	99	99	99	99	99	99	99	99	99	99
310	KL09-20-310	99	99	99	99	99	99	99	99	99	99	99	99	99	99	99	99	99	99	99	99	99	99	99	99	99	99	99	99	99	99	99	99	99	99	99	99	99	99	99	99	99	99	99	99	99	99	99	99
311	KL09-20-311	3	1	2	4	4	2	1	1	1	1	2	5	4	1	2	2	5	4	4	5	2	1	88	1	88	2	2	0	0	0	0	0	1	0	0		0	0	6	1	6	1	6	1	5	1	6	1
312	KL09-20-312	3	1	2	4	4	4	1	1	1	1	1	3	1	2	2	2	5	3	1	5	1	1	88	4	血壓藥，膽固醇藥	1	1	88	88	88	88	88	88	88	88	88	0	0	6	1	6	2	6	2	1	0	6	2
313	KL09-20-313	99	99	99	99	99	99	99	99	99	99	99	99	99	99	99	99	99	99	99	99	99	99	99	99	99	99	99	99	99	99	99	99	99	99	99	99	99	99	99	99	99	99	99	99	99	99	99	99
314	KL09-20-314	99	99	99	99	99	99	99	99	99	99	99	99	99	99	99	99	99	99	99	99	99	99	99	99	99	99	99	99	99	99	99	99	99	99	99	99	99	99	99	99	99	99	99	99	99	99	99	99
315	KL09-21-315	99	99	99	99	99	99	99	99	99	99	99	99	99	99	99	99	99	99	99	99	99	99	99	99	99	99	99	99	99	99	99	99	99	99	99	99	99	99	99	99	99	99	99	99	99	99	99	99
316	KL09-21-316	2	4	2	4	4	4	4	1	1	1	3	3	3	2	2	3	4	4	1	5	1	1	88	1	88	1	1	88	88	88	88	88	88	88	88	88	1	99	4	1	6	3	4	1	3	1	4	1
317	KL09-21-317	99	99	99	99	99	99	99	99	99	99	99	99	99	99	99	99	99	99	99	99	99	99	99	99	99	99	99	99	99	99	99	99	99	99	99	99	99	99	99	99	99	99	99	99	99	99	99	99
318	KL09-21-318	99	99	99	99	99	99	99	99	99	99	99	99	99	99	99	99	99	99	99	99	99	99	99	99	99	99	99	99	99	99	99	99	99	99	99	99	99	99	99	99	99	99	99	99	99	99	99	99
319	KL09-21-319	99	99	99	99	99	99	99	99	99	99	99	99	99	99	99	99	99	99	99	99	99	99	99	99	99	99	99	99	99	99	99	99	99	99	99	99	99	99	99	99	99	99	99	99	99	99	99	99
320	NT10-22-320	3	1	1	3	4	2	3	2	1	2	2	2	2	1	2	3	4	4	1	5	1	1	88	2	88	2	2	0	0	0	0	1	0	0	0		2/7	0	5	1	6	2	4	1	2	1	6	3
321	NT10-22-321	99	99	99	99	99	99	99	99	99	99	99	99	99	99	99	99	99	99	99	99	99	99	99	99	99	99	99	99	99	99	99	99	99	99	99	99	99	99	99	99	99	99	99	99	99	99	99	99
322	NT10-22-322	99	99	99	99	99	99	99	99	99	99	99	99	99	99	99	99	99	99	99	99	99	99	99	99	99	99	99	99	99	99	99	99	99	99	99	99	99	99	99	99	99	99	99	99	99	99	99	99
323	NT10-22-323	99	99	99	99	99	99	99	99	99	99	99	99	99	99	99	99	99	99	99	99	99	99	99	99	99	99	99	99	99	99	99	99	99	99	99	99	99	99	99	99	99	99	99	99	99	99	99	99
324	NT10-22-324	99	99	99	99	99	99	99	99	99	99	99	99	99	99	99	99	99	99	99	99	99	99	99	99	99	99	99	99	99	99	99	99	99	99	99	99	99	99	99	99	99	99	99	99	99	99	99	99
325	NT10-22-325	3	3	2	3	3	3	2	2	1	1	1	3	1	2	2	2	1	3	1	5	2	1	88	1	88	3	1	88	88	88	88	88	88	88	88	88	0	0	7	1	4	1	5	1	3	1	5	1
326	NT10-22-326	3	1	2	4	4	4	2	1	1	1	2	4	2	2	2	2	4	4	1	5	2	1	88	4	尿道炎藥	3	2	0	0	0	0	1	0	0	0		1	0	6	1	6	2	4	1	3	1	4	3
327	NT10-22-327	99	99	99	99	99	99	99	99	99	99	99	99	99	99	99	99	99	99	99	99	99	99	99	99	99	99	99	99	99	99	99	99	99	99	99	99	99	99	99	99	99	99	99	99	99	99	99	99
328	NT10-22-328	99	99	99	99	99	99	99	99	99	99	99	99	99	99	99	99	99	99	99	99	99	99	99	99	99	99	99	99	99	99	99	99	99	99	99	99	99	99	99	99	99	99	99	99	99	99	99	99
329	NT10-22-329	99	99	99	99	99	99	99	99	99	99	99	99	99	99	99	99	99	99	99	99	99	99	99	99	99	99	99	99	99	99	99	99	99	99	99	99	99	99	99	99	99	99	99	99	99	99	99	99
330	NT10-22-330	99	99	99	99	99	99	99	99	99	99	99	99	99	99	99	99	99	99	99	99	99	99	99	99	99	99	99	99	99	99	99	99	99	99	99	99	99	99	99	99	99	99	99	99	99	99	99	99
331	NT10-22-331	99	99	99	99	99	99	99	99	99	99	99	99	99	99	99	99	99	99	99	99	99	99	99	99	99	99	99	99	99	99	99	99	99	99	99	99	99	99	99	99	99	99	99	99	99	99	99	99
332	NT10-22-332	99	99	99	99	99	99	99	99	99	99	99	99	99	99	99	99	99	99	99	99	99	99	99	99	99	99	99	99	99	99	99	99	99	99	99	99	99	99	99	99	99	99	99	99	99	99	99	99
333	NT10-22-333	99	99	99	99	99	99	99	99	99	99	99	99	99	99	99	99	99	99	99	99	99	99	99	99	99	99	99	99	99	99	99	99	99	99	99	99	99	99	99	99	99	99	99	99	99	99	99	99
334	NT10-22-334	99	99	99	99	99	99	99	99	99	99	99	99	99	99	99	99	99	99	99	99	99	99	99	99	99	99	99	99	99	99	99	99	99	99	99	99	99	99	99	99	99	99	99	99	99	99	99	99
335	NT10-22-335	99	99	99	99	99	99	99	99	99	99	99	99	99	99	99	99	99	99	99	99	99	99	99	99	99	99	99	99	99	99	99	99	99	99	99	99	99	99	99	99	99	99	99	99	99	99	99	99
336	NT10-22-336	99	99	99	99	99	99	99	99	99	99	99	99	99	99	99	99	99	99	99	99	99	99	99	99	99	99	99	99	99	99	99	99	99	99	99	99	99	99	99	99	99	99	99	99	99	99	99	99
337	NT10-22-337	99	99	99	99	99	99	99	99	99	99	99	99	99	99	99	99	99	99	99	99	99	99	99	99	99	99	99	99	99	99	99	99	99	99	99	99	99	99	99	99	99	99	99	99	99	99	99	99
338	NT10-22-338	99	99	99	99	99	99	99	99	99	99	99	99	99	99	99	99	99	99	99	99	99	99	99	99	99	99	99	99	99	99	99	99	99	99	99	99	99	99	99	99	99	99	99	99	99	99	99	99
339	NT10-22-339	99	99	99	99	99	99	99	99	99	99	99	99	99	99	99	99	99	99	99	99	99	99	99	99	99	99	99	99	99	99	99	99	99	99	99	99	99	99	99	99	99	99	99	99	99	99	99	99
340	NT10-23-340	99	99	99	99	99	99	99	99	99	99	99	99	99	99	99	99	99	99	99	99	99	99	99	99	99	99	99	99	99	99	99	99	99	99	99	99	99	99	99	99	99	99	99	99	99	99	99	99
341	NT10-23-341	99	99	99	99	99	99	99	99	99	99	99	99	99	99	99	99	99	99	99	99	99	99	99	99	99	99	99	99	99	99	99	99	99	99	99	99	99	99	99	99	99	99	99	99	99	99	99	99
342	NT10-23-342	99	99	99	99	99	99	99	99	99	99	99	99	99	99	99	99	99	99	99	99	99	99	99	99	99	99	99	99	99	99	99	99	99	99	99	99	99	99	99	99	99	99	99	99	99	99	99	99
343	NT10-23-343	99	99	99	99	99	99	99	99	99	99	99	99	99	99	99	99	99	99	99	99	99	99	99	99	99	99	99	99	99	99	99	99	99	99	99	99	99	99	99	99	99	99	99	99	99	99	99	99
344	NT10-23-344	3	3	1	3	4	3	3	1	1	1	2	4	3	1	1	1	4	4	1	5	2	1	88	1	88	2	2	0	0	0	0	1	1	0	0		0	0	3	1	3	1	3	1	2	1	2	2
345	NT10-23-345	99	99	99	99	99	99	99	99	99	99	99	99	99	99	99	99	99	99	99	99	99	99	99	99	99	99	99	99	99	99	99	99	99	99	99	99	99	99	99	99	99	99	99	99	99	99	99	99
346	NT10-23-346	99	99	99	99	99	99	99	99	99	99	99	99	99	99	99	99	99	99	99	99	99	99	99	99	99	99	99	99	99	99	99	99	99	99	99	99	99	99	99	99	99	99	99	99	99	99	99	99
347	NT10-23-347	3	2	2	4	4	3	2	1	1	1	3	4	4	2	2	3	5	5	1	5	2	1	88	1	88	4	1	88	88	88	88	88	88	88	88	88	0	0	5	1	5	1	3	99	99	99	99	99
348	NT10-23-348	3	1	1	1	2	1	2	1	1	2	2	2	2	1	2	3	5	2	2	5	1	1	88	4	消炎，止痛藥	3	2	0	0	0	0	0	0	1	0		99	99	5	1	5	2	4	1	5	0.5	5	2
349	NT10-23-349	3	3	2	4	3	4	1	1	1	2	2	3	4	2	2	2	4	4	1	5	2	2	鼻炎	1	88	3	1	88	88	88	88	88	88	88	88	88	0	0	6	1	6	1	3	1	2	1	4	1
350	NT10-23-350	3	1	2	3	4	4	2	1	1	1	3	3	3	2	2	2	2	4	1	5	1	1	88	1	88	3	2	0	0	0	0	1	0	0	0		0	0	6	2	4	2	4	1	2	1	4	5
351	NT10-23-351	99	99	99	99	99	99	99	99	99	99	99	99	99	99	99	99	99	99	99	99	99	99	99	99	99	99	99	99	99	99	99	99	99	99	99	99	99	99	99	99	99	99	99	99	99	99	99	99
352	NT10-23-352	2	1	2	4	4	4	3	1	1	1	2	3	3	2	2	3	3	4	1	5	2	2	高血壓	4	Lisinopril 10mg QD, Metoprolol Tarate 50mg BD, Nifedipine 20mg BD	1	1	88	88	88	88	88	88	88	88	88	3	2	6	3	5	2	3	1	2	1	5	5
353	NT10-23-353	3	4	1	4	1	4	1	2	1	1	2	3	2	2	2	2	3	3	2	3	2	2	99	1	88	2	2	0	0	0	0	0	0	1	0		1	99	5	1	4	1	3	1	3	1	4	2
354	NT10-23-354	2	1	2	4	4	4	1	1	3	1	3	4	4	2	2	2	2	2	1	5	1	1	88	1	88	2	1	88	88	88	88	88	88	88	88	88	0	0	6	3	5	2	4	2	2	2	5	2
355	NT10-23-355	2	1	2	4	3	4	4	2	1	1	3	5	5	1	2	1	2	2	1	5	2	1	88	1	88	2	1	88	88	88	88	88	88	88	88	88	0	0	6	1	6	2	6	1	2	1	5	2
356	NT10-23-356	2	1	2	4	4	4	1	1	1	1	2	5	3	2	2	2	4	2	2	5	2	1	88	1	88	2	1	88	88	88	88	88	88	88	88	88	0	0	6	1	6	2	6	1	2	1	1	0
357	NT10-23-357	3	3	2	4	4	4	1	1	1	1	1	3	2	2	2	3	5	5	1	5	1	1	88	1	88	3	1	88	88	88	88	88	88	88	88	88	0	0	6	1	6	1	5	1	2	1	6	2
358	NT10-24-358	99	99	99	99	99	99	99	99	99	99	99	99	99	99	99	99	99	99	99	99	99	99	99	99	99	99	99	99	99	99	99	99	99	99	99	99	99	99	99	99	99	99	99	99	99	99	99	99
359	NT10-24-359	99	99	99	99	99	99	99	99	99	99	99	99	99	99	99	99	99	99	99	99	99	99	99	99	99	99	99	99	99	99	99	99	99	99	99	99	99	99	99	99	99	99	99	99	99	99	99	99
360	NT10-24-360	3	1	2	3	4	4	1	1	1	1	2	4	3	2	2	2	5	1	2	5	2	1	88	4	感冒藥	3	1	88	88	88	88	88	88	88	88	88	0	0	6	3	6	2	5	1	3	1	5	1
361	NT10-24-361	99	99	99	99	99	99	99	99	99	99	99	99	99	99	99	99	99	99	99	99	99	99	99	99	99	99	99	99	99	99	99	99	99	99	99	99	99	99	99	99	99	99	99	99	99	99	99	99
362	NT10-24-362	99	99	99	99	99	99	99	99	99	99	99	99	99	99	99	99	99	99	99	99	99	99	99	99	99	99	99	99	99	99	99	99	99	99	99	99	99	99	99	99	99	99	99	99	99	99	99	99
363	NT10-24-363	99	99	99	99	99	99	99	99	99	99	99	99	99	99	99	99	99	99	99	99	99	99	99	99	99	99	99	99	99	99	99	99	99	99	99	99	99	99	99	99	99	99	99	99	99	99	99	99
364	NT10-24-364	99	99	99	99	99	99	99	99	99	99	99	99	99	99	99	99	99	99	99	99	99	99	99	99	99	99	99	99	99	99	99	99	99	99	99	99	99	99	99	99	99	99	99	99	99	99	99	99
365	NT10-24-365	99	99	99	99	99	99	99	99	99	99	99	99	99	99	99	99	99	99	99	99	99	99	99	99	99	99	99	99	99	99	99	99	99	99	99	99	99	99	99	99	99	99	99	99	99	99	99	99
366	NT10-24-366	99	99	99	99	99	99	99	99	99	99	99	99	99	99	99	99	99	99	99	99	99	99	99	99	99	99	99	99	99	99	99	99	99	99	99	99	99	99	99	99	99	99	99	99	99	99	99	99
367	NT10-24-367	99	99	99	99	99	99	99	99	99	99	99	99	99	99	99	99	99	99	99	99	99	99	99	99	99	99	99	99	99	99	99	99	99	99	99	99	99	99	99	99	99	99	99	99	99	99	99	99
368	NT10-24-368	99	99	99	99	99	99	99	99	99	99	99	99	99	99	99	99	99	99	99	99	99	99	99	99	99	99	99	99	99	99	99	99	99	99	99	99	99	99	99	99	99	99	99	99	99	99	99	99
369	NT10-24-369	99	99	99	99	99	99	99	99	99	99	99	99	99	99	99	99	99	99	99	99	99	99	99	99	99	99	99	99	99	99	99	99	99	99	99	99	99	99	99	99	99	99	99	99	99	99	99	99
370	NT10-24-370	99	99	99	99	99	99	99	99	99	99	99	99	99	99	99	99	99	99	99	99	99	99	99	99	99	99	99	99	99	99	99	99	99	99	99	99	99	99	99	99	99	99	99	99	99	99	99	99
371	NT10-24-371	99	99	99	99	99	99	99	99	99	99	99	99	99	99	99	99	99	99	99	99	99	99	99	99	99	99	99	99	99	99	99	99	99	99	99	99	99	99	99	99	99	99	99	99	99	99	99	99
372	NT10-24-372	99	99	99	99	99	99	99	99	99	99	99	99	99	99	99	99	99	99	99	99	99	99	99	99	99	99	99	99	99	99	99	99	99	99	99	99	99	99	99	99	99	99	99	99	99	99	99	99
373	NT10-24-373	99	99	99	99	99	99	99	99	99	99	99	99	99	99	99	99	99	99	99	99	99	99	99	99	99	99	99	99	99	99	99	99	99	99	99	99	99	99	99	99	99	99	99	99	99	99	99	99
374	NT10-24-374	99	99	99	99	99	99	99	99	99	99	99	99	99	99	99	99	99	99	99	99	99	99	99	99	99	99	99	99	99	99	99	99	99	99	99	99	99	99	99	99	99	99	99	99	99	99	99	99
375	NT10-24-375	99	99	99	99	99	99	99	99	99	99	99	99	99	99	99	99	99	99	99	99	99	99	99	99	99	99	99	99	99	99	99	99	99	99	99	99	99	99	99	99	99	99	99	99	99	99	99	99
376	NT10-24-376	99	99	99	99	99	99	99	99	99	99	99	99	99	99	99	99	99	99	99	99	99	99	99	99	99	99	99	99	99	99	99	99	99	99	99	99	99	99	99	99	99	99	99	99	99	99	99	99
377	NT10-24-377	99	99	99	99	99	99	99	99	99	99	99	99	99	99	99	99	99	99	99	99	99	99	99	99	99	99	99	99	99	99	99	99	99	99	99	99	99	99	99	99	99	99	99	99	99	99	99	99
378	NT10-24-378	99	99	99	99	99	99	99	99	99	99	99	99	99	99	99	99	99	99	99	99	99	99	99	99	99	99	99	99	99	99	99	99	99	99	99	99	99	99	99	99	99	99	99	99	99	99	99	99
379	NT10-24-379	99	99	99	99	99	99	99	99	99	99	99	99	99	99	99	99	99	99	99	99	99	99	99	99	99	99	99	99	99	99	99	99	99	99	99	99	99	99	99	99	99	99	99	99	99	99	99	99
380	NT11-25-380	3	1	2	4	4	4	2	1	1	2	2	3	4	2	2	2	5	5	1	5	2	1	88	4	感冒藥	1	1	88	88	88	88	88	88	88	88	88	0	0	6	0.5	6	1	5	1	2	1	6	1
381	NT11-25-381	3	1	2	4	4	1	2	1	1	1	2	3	3	2	2	2	4	4	3	5	1	1	88	1	88	3	1	88	88	88	88	88	88	88	88	88	1	99	6	0.5	6	1	4	1	4	0.5	6	2
382	NT11-25-382	99	99	99	99	99	99	99	99	99	99	99	99	99	99	99	99	99	99	99	99	99	99	99	99	99	99	99	99	99	99	99	99	99	99	99	99	99	99	99	99	99	99	99	99	99	99	99	99
383	NT11-25-383	99	99	99	99	99	99	99	99	99	99	99	99	99	99	99	99	99	99	99	99	99	99	99	99	99	99	99	99	99	99	99	99	99	99	99	99	99	99	99	99	99	99	99	99	99	99	99	99
384	NT11-25-384	99	99	99	99	99	99	99	99	99	99	99	99	99	99	99	99	99	99	99	99	99	99	99	99	99	99	99	99	99	99	99	99	99	99	99	99	99	99	99	99	99	99	99	99	99	99	99	99
385	NT11-25-385	3	1	1	3	3	4	1	2	2	1	1	3	3	2	2	3	3	5	1	5	2	2	甲狀腺切除	4	甲狀腺補充劑	3	1	88	88	88	88	88	88	88	88	88	0	0	6	2	3	1	4	1	4	1	6	1
386	NT11-25-386	99	99	99	99	99	99	99	99	99	99	99	99	99	99	99	99	99	99	99	99	99	99	99	99	99	99	99	99	99	99	99	99	99	99	99	99	99	99	99	99	99	99	99	99	99	99	99	99
387	NT11-25-387	99	99	99	99	99	99	99	99	99	99	99	99	99	99	99	99	99	99	99	99	99	99	99	99	99	99	99	99	99	99	99	99	99	99	99	99	99	99	99	99	99	99	99	99	99	99	99	99
388	NT11-25-388	99	99	99	99	99	99	99	99	99	99	99	99	99	99	99	99	99	99	99	99	99	99	99	99	99	99	99	99	99	99	99	99	99	99	99	99	99	99	99	99	99	99	99	99	99	99	99	99
389	NT11-25-389	99	99	99	99	99	99	99	99	99	99	99	99	99	99	99	99	99	99	99	99	99	99	99	99	99	99	99	99	99	99	99	99	99	99	99	99	99	99	99	99	99	99	99	99	99	99	99	99
390	NT11-25-390	99	99	99	99	99	99	99	99	99	99	99	99	99	99	99	99	99	99	99	99	99	99	99	99	99	99	99	99	99	99	99	99	99	99	99	99	99	99	99	99	99	99	99	99	99	99	99	99
391	NT11-25-391	3	3	1	4	4	4	1	2	1	1	2	3	1	2	2	3	5	5	1	5	1	1	88	1	88	3	1	88	88	88	88	88	88	88	88	88	1	0	6	1	5	1	5	1	2	1	6	2
392	NT11-25-392	99	99	99	99	99	99	99	99	99	99	99	99	99	99	99	99	99	99	99	99	99	99	99	99	99	99	99	99	99	99	99	99	99	99	99	99	99	99	99	99	99	99	99	99	99	99	99	99
393	NT11-25-393	99	99	99	99	99	99	99	99	99	99	99	99	99	99	99	99	99	99	99	99	99	99	99	99	99	99	99	99	99	99	99	99	99	99	99	99	99	99	99	99	99	99	99	99	99	99	99	99
394	NT11-25-394	99	99	99	99	99	99	99	99	99	99	99	99	99	99	99	99	99	99	99	99	99	99	99	99	99	99	99	99	99	99	99	99	99	99	99	99	99	99	99	99	99	99	99	99	99	99	99	99
395	NT11-25-395	3	1	2	3	3	4	4	2	1	3	3	4	3	2	2	3	4	3	4	5	2	2	先天性貧血	4	傷風感冒藥	3	2	0	0	0	0	0	1	1	0		2	99	3	1	3	1	3	1	1	1	3	2
396	NT11-25-396	1	4	1	4	4	4	1	2	1	1	2	2	1	2	2	1	3	3	1	5	1	1	88	1	88	1	2	0	1	0	0	1	0	0	0		1	99	6	1	5	1	5	1	5	1	5	3
397	NT11-25-397	3	3	1	3	3	3	4	2	1	1	1	2	2	1	1	1	2	2	1	1	1	1	88	1	88	1	1	88	88	88	88	88	88	88	88	88	0	0	3	1	2	1	3	1	4	1	4	3
398	NT11-25-398	99	99	99	99	99	99	99	99	99	99	99	99	99	99	99	99	99	99	99	99	99	99	99	99	99	99	99	99	99	99	99	99	99	99	99	99	99	99	99	99	99	99	99	99	99	99	99	99
399	NT11-25-399	2	1	2	4	4	1	3	1	1	1	3	4	3	1	2	4	5	5	1	5	2	2	類風濕關節炎	4	Methotrexate, simvastatin, hydroxychloroquine sulphate folic acid	3	1	88	88	88	88	88	88	88	88	88	0	0	4	1	5	0.5	2	1	2	1	6	2
400	NT11-25-400	99	99	99	99	99	99	99	99	99	99	99	99	99	99	99	99	99	99	99	99	99	99	99	99	99	99	99	99	99	99	99	99	99	99	99	99	99	99	99	99	99	99	99	99	99	99	99	99
401	NT11-25-401	2	1	2	4	4	1	4	1	1	1	2	4	4	2	2	2	5	4	1	5	2	1	88	1	88	3	2	0	0	0	0	1	0	0	0		0	0	6	2	5	2	6	2	2	1	5	1
402	NT11-25-402	3	3	2	3	4	3	2	1	1	1	3	3	3	1	2	4	4	4	4	5	1	1	88	1	88	2	1	88	88	88	88	88	88	88	88	88	0	0	5	0.5	5	1	3	1	2	1	4	2
403	NT11-25-403	99	99	99	99	99	99	99	99	99	99	99	99	99	99	99	99	99	99	99	99	99	99	99	99	99	99	99	99	99	99	99	99	99	99	99	99	99	99	99	99	99	99	99	99	99	99	99	99
404	NT11-25-404	99	99	99	99	99	99	99	99	99	99	99	99	99	99	99	99	99	99	99	99	99	99	99	99	99	99	99	99	99	99	99	99	99	99	99	99	99	99	99	99	99	99	99	99	99	99	99	99
405	NT11-26-405	99	99	99	99	99	99	99	99	99	99	99	99	99	99	99	99	99	99	99	99	99	99	99	99	99	99	99	99	99	99	99	99	99	99	99	99	99	99	99	99	99	99	99	99	99	99	99	99
406	NT11-26-406	99	99	99	99	99	99	99	99	99	99	99	99	99	99	99	99	99	99	99	99	99	99	99	99	99	99	99	99	99	99	99	99	99	99	99	99	99	99	99	99	99	99	99	99	99	99	99	99
407	NT11-26-407	99	99	99	99	99	99	99	99	99	99	99	99	99	99	99	99	99	99	99	99	99	99	99	99	99	99	99	99	99	99	99	99	99	99	99	99	99	99	99	99	99	99	99	99	99	99	99	99
408	NT11-26-408	99	99	99	99	99	99	99	99	99	99	99	99	99	99	99	99	99	99	99	99	99	99	99	99	99	99	99	99	99	99	99	99	99	99	99	99	99	99	99	99	99	99	99	99	99	99	99	99
409	NT11-26-409	99	99	99	99	99	99	99	99	99	99	99	99	99	99	99	99	99	99	99	99	99	99	99	99	99	99	99	99	99	99	99	99	99	99	99	99	99	99	99	99	99	99	99	99	99	99	99	99
410	NT11-26-410	3	1	2	1	1	4	1	2	2	1	3	3	3	2	2	3	2	3	1	5	1	1	88	1	88	2	1	88	88	88	88	88	88	88	88	88	0	0	6	2	6	2	4	1	5	1	6	1
411	NT11-26-411	99	99	99	99	99	99	99	99	99	99	99	99	99	99	99	99	99	99	99	99	99	99	99	99	99	99	99	99	99	99	99	99	99	99	99	99	99	99	99	99	99	99	99	99	99	99	99	99
412	NT11-26-412	99	99	99	99	99	99	99	99	99	99	99	99	99	99	99	99	99	99	99	99	99	99	99	99	99	99	99	99	99	99	99	99	99	99	99	99	99	99	99	99	99	99	99	99	99	99	99	99
413	NT12-27-413	99	99	99	99	99	99	99	99	99	99	99	99	99	99	99	99	99	99	99	99	99	99	99	99	99	99	99	99	99	99	99	99	99	99	99	99	99	99	99	99	99	99	99	99	99	99	99	99
414	NT12-27-414	99	99	99	99	99	99	99	99	99	99	99	99	99	99	99	99	99	99	99	99	99	99	99	99	99	99	99	99	99	99	99	99	99	99	99	99	99	99	99	99	99	99	99	99	99	99	99	99
415	NT12-27-415	99	99	99	99	99	99	99	99	99	99	99	99	99	99	99	99	99	99	99	99	99	99	99	99	99	99	99	99	99	99	99	99	99	99	99	99	99	99	99	99	99	99	99	99	99	99	99	99
416	NT12-27-416	99	99	99	99	99	99	99	99	99	99	99	99	99	99	99	99	99	99	99	99	99	99	99	99	99	99	99	99	99	99	99	99	99	99	99	99	99	99	99	99	99	99	99	99	99	99	99	99
417	NT12-27-417	99	99	99	99	99	99	99	99	99	99	99	99	99	99	99	99	99	99	99	99	99	99	99	99	99	99	99	99	99	99	99	99	99	99	99	99	99	99	99	99	99	99	99	99	99	99	99	99
418	NT12-27-418	99	99	99	99	99	99	99	99	99	99	99	99	99	99	99	99	99	99	99	99	99	99	99	99	99	99	99	99	99	99	99	99	99	99	99	99	99	99	99	99	99	99	99	99	99	99	99	99
419	NT12-27-419	99	99	99	99	99	99	99	99	99	99	99	99	99	99	99	99	99	99	99	99	99	99	99	99	99	99	99	99	99	99	99	99	99	99	99	99	99	99	99	99	99	99	99	99	99	99	99	99
420	NT12-27-420	99	99	99	99	99	99	99	99	99	99	99	99	99	99	99	99	99	99	99	99	99	99	99	99	99	99	99	99	99	99	99	99	99	99	99	99	99	99	99	99	99	99	99	99	99	99	99	99
421	NT12-28-421	2	1	1	4	4	4	1	1	1	2	2	3	3	2	2	2	4	4	1	5	2	1	88	1	88	3	1	88	88	88	88	88	88	88	88	88	1	80	6	1	5	1	3	1	3	1	5	1
422	NT12-28-422	99	99	99	99	99	99	99	99	99	99	99	99	99	99	99	99	99	99	99	99	99	99	99	99	99	99	99	99	99	99	99	99	99	99	99	99	99	99	99	99	99	99	99	99	99	99	99	99
423	NT12-28-423	99	99	99	99	99	99	99	99	99	99	99	99	99	99	99	99	99	99	99	99	99	99	99	99	99	99	99	99	99	99	99	99	99	99	99	99	99	99	99	99	99	99	99	99	99	99	99	99
424	NT12-28-424	99	99	99	99	99	99	99	99	99	99	99	99	99	99	99	99	99	99	99	99	99	99	99	99	99	99	99	99	99	99	99	99	99	99	99	99	99	99	99	99	99	99	99	99	99	99	99	99
425	NT12-28-425	2	3	2	4	4	4	2	1	1	1	2	4	3	1	2	4	4	5	1	5	2	1	88	1	88	1	2	1	0	0	0	0	0	0	0	0	1	99	6	2	5	1	3	1	1	0	6	4
426	NT12-28-426	3	1	2	4	4	4	1	2	1	2	2	3	2	2	2	3	5	3	4	5	1	1	88	1	88	3	1	88	88	88	88	88	88	88	88	88	1	70	4	0.5	6	1-2	3	1	2	1	5	4
427	NT12-28-427	99	99	99	99	99	99	99	99	99	99	99	99	99	99	99	99	99	99	99	99	99	99	99	99	99	99	99	99	99	99	99	99	99	99	99	99	99	99	99	99	99	99	99	99	99	99	99	99
428	NT12-28-428	3	3	1	4	4	1	4	2	1	2	3	3	3	2	2	2	3	3	1	5	2	1	88	4	鼻敏感用噴劑含輕量	3	2	0	0	0	0	0	1	1	0		6	5	4	1	4	3	5	2	3	1	5	3
429	NT12-28-429	3	3	1	2	4	4	2	1	4	2	3	3	1	2	2	3	4	4	3	5	1	1	88	1	88	2	2	1	0	0	0	0	0	0	0		1	99	3	1	5	1	5	1	1	0	3	6
430	NT12-28-430	99	99	99	99	99	99	99	99	99	99	99	99	99	99	99	99	99	99	99	99	99	99	99	99	99	99	99	99	99	99	99	99	99	99	99	99	99	99	99	99	99	99	99	99	99	99	99	99
431	NT12-28-431	2	1	2	1	3	4	1	1	4	2	2	4	3	1	2	3	5	2	1	5	2	2	糖尿病	2	88	2	1	88	88	88	88	88	88	88	88	88	0	0	5	1	5	1	3	0.5	2	0.5	5	2
432	NT12-28-432	3	1	2	4	3	1	1	1	1	1	2	3	1	2	2	3	5	4	1	5	1	2	胃痛	1	1	1	88	88	88	88	88	88	88	88	88	88	0	0	3	1	5	1	3	1	5	1	3	1
433	NT12-28-433	99	99	99	99	99	99	99	99	99	99	99	99	99	99	99	99	99	99	99	99	99	99	99	99	99	99	99	99	99	99	99	99	99	99	99	99	99	99	99	99	99	99	99	99	99	99	99	99
434	NT12-28-434	3	1	1	4	4	4	4	2	1	3	3	4	4	2	2	2	1	2	1	5	2	1	88	1	88	3	2	1	0	0	0	0	0	0	0	0	0-1	0	6	2	5	1	3	1	3	2	6	5
435	NT12-29-435	99	99	99	99	99	99	99	99	99	99	99	99	99	99	99	99	99	99	99	99	99	99	99	99	99	99	99	99	99	99	99	99	99	99	99	99	99	99	99	99	99	99	99	99	99	99	99	99
436	NT12-29-436	3	1	1	3	4	4	3	1	1	1	2	3	3	2	2	3	3	2	2	5	2	1	88	2	88	2	1	88	88	88	88	88	88	88	88	88	3	80	6	1	6	2	5	1	1	0	5	2
437	NT12-29-437	99	99	99	99	99	99	99	99	99	99	99	99	99	99	99	99	99	99	99	99	99	99	99	99	99	99	99	99	99	99	99	99	99	99	99	99	99	99	99	99	99	99	99	99	99	99	99	99
438	NT12-29-438	3	1	1	4	4	4	2	2	1	2	2	1	1	2	2	3	5	5	1	5	1	1	88	1	88	2	2	0	0	0	0	0	1	1	0		0	0	6	1	6	2-3	6	2	3	1-2	6	1
439	NT12-29-439	99	99	99	99	99	99	99	99	99	99	99	99	99	99	99	99	99	99	99	99	99	99	99	99	99	99	99	99	99	99	99	99	99	99	99	99	99	99	99	99	99	99	99	99	99	99	99	99
440	NT12-29-440	99	99	99	99	99	99	99	99	99	99	99	99	99	99	99	99	99	99	99	99	99	99	99	99	99	99	99	99	99	99	99	99	99	99	99	99	99	99	99	99	99	99	99	99	99	99	99	99
441	NT12-29-441	3	3	2	4	3	3	2	2	1	1	2	3	2	2	2	1	2	4	1	5	1	1	88	4	感冒藥	2	1	88	88	88	88	88	88	88	88	88	0	0	6	0.5	6	1	6	1	3	1	4	2
442	NT12-29-442	3	1	2	4	4	4	1	2	1	1	2	3	3	2	2	4	5	4	1	5	1	1	88	1	88	2	1	88	88	88	88	88	88	88	88	88	0	0	2	1	6	1	3	1	2	1	5	1
443	NT12-29-443	99	99	99	99	99	99	99	99	99	99	99	99	99	99	99	99	99	99	99	99	99	99	99	99	99	99	99	99	99	99	99	99	99	99	99	99	99	99	99	99	99	99	99	99	99	99	99	99
444	NT12-29-444	99	99	99	99	99	99	99	99	99	99	99	99	99	99	99	99	99	99	99	99	99	99	99	99	99	99	99	99	99	99	99	99	99	99	99	99	99	99	99	99	99	99	99	99	99	99	99	99
445	NT12-29-445	99	99	99	99	99	99	99	99	99	99	99	99	99	99	99	99	99	99	99	99	99	99	99	99	99	99	99	99	99	99	99	99	99	99	99	99	99	99	99	99	99	99	99	99	99	99	99	99
446	NT12-29-446	3	4	2	3	4	3	3	2	1	2	1	4	3	2	2	2	5	2	1	5	1	1	88	4	皮膚敏感藥	2	1	88	88	88	88	88	88	88	88	88	0	0	4	1	5	1	4	1	1	0	5	1
447	NT12-29-447	99	99	99	99	99	99	99	99	99	99	99	99	99	99	99	99	99	99	99	99	99	99	99	99	99	99	99	99	99	99	99	99	99	99	99	99	99	99	99	99	99	99	99	99	99	99	99	99
448	NT12-29-448	99	99	99	99	99	99	99	99	99	99	99	99	99	99	99	99	99	99	99	99	99	99	99	99	99	99	99	99	99	99	99	99	99	99	99	99	99	99	99	99	99	99	99	99	99	99	99	99
449	NT12-29-449	99	99	99	99	99	99	99	99	99	99	99	99	99	99	99	99	99	99	99	99	99	99	99	99	99	99	99	99	99	99	99	99	99	99	99	99	99	99	99	99	99	99	99	99	99	99	99	99
450	NT12-29-450	99	99	99	99	99	99	99	99	99	99	99	99	99	99	99	99	99	99	99	99	99	99	99	99	99	99	99	99	99	99	99	99	99	99	99	99	99	99	99	99	99	99	99	99	99	99	99	99
451	NT12-29-451	99	99	99	99	99	99	99	99	99	99	99	99	99	99	99	99	99	99	99	99	99	99	99	99	99	99	99	99	99	99	99	99	99	99	99	99	99	99	99	99	99	99	99	99	99	99	99	99
452	NT12-29-452	99	99	99	99	99	99	99	99	99	99	99	99	99	99	99	99	99	99	99	99	99	99	99	99	99	99	99	99	99	99	99	99	99	99	99	99	99	99	99	99	99	99	99	99	99	99	99	99
453	NT13-30-453	99	99	99	99	99	99	99	99	99	99	99	99	99	99	99	99	99	99	99	99	99	99	99	99	99	99	99	99	99	99	99	99	99	99	99	99	99	99	99	99	99	99	99	99	99	99	99	99
454	NT13-30-454	2	1	2	3	4	3	2	2	1	2	1	3	2	2	2	2	4	4	1	5	1	1	88	1	88	3	1	88	88	88	88	88	88	88	88	88	0-1	99	6	0.5	5	2	5	1	4	1	5	2-3
455	NT13-30-455	99	99	99	99	99	99	99	99	99	99	99	99	99	99	99	99	99	99	99	99	99	99	99	99	99	99	99	99	99	99	99	99	99	99	99	99	99	99	99	99	99	99	99	99	99	99	99	99
456	NT13-30-456	99	99	99	99	99	99	99	99	99	99	99	99	99	99	99	99	99	99	99	99	99	99	99	99	99	99	99	99	99	99	99	99	99	99	99	99	99	99	99	99	99	99	99	99	99	99	99	99
457	NT13-30-457	2	1	2	4	4	4	2	1	1	1	2	3	2	2	2	2	5	4	1	5	1	1	88	1	88	3	2	0	0	0	0	0	0	1	0		0	0	6	1	5	2	5	2	2	1	6	2-4
458	NT13-30-458	99	99	99	99	99	99	99	99	99	99	99	99	99	99	99	99	99	99	99	99	99	99	99	99	99	99	99	99	99	99	99	99	99	99	99	99	99	99	99	99	99	99	99	99	99	99	99	99
459	NT13-30-459	3	1	2	3	2	2	2	2	1	1	2	3	3	1	1	2	5	2	1	5	1	1	88	1	88	2	2	0	0	0	0	1	0	0	0		0	0	6	1	6	1	5	2	3	1	4	1
460	NT13-30-460	99	99	99	99	99	99	99	99	99	99	99	99	99	99	99	99	99	99	99	99	99	99	99	99	99	99	99	99	99	99	99	99	99	99	99	99	99	99	99	99	99	99	99	99	99	99	99	99
461	NT13-30-461	99	99	99	99	99	99	99	99	99	99	99	99	99	99	99	99	99	99	99	99	99	99	99	99	99	99	99	99	99	99	99	99	99	99	99	99	99	99	99	99	99	99	99	99	99	99	99	99
462	NT13-30-462	99	99	99	99	99	99	99	99	99	99	99	99	99	99	99	99	99	99	99	99	99	99	99	99	99	99	99	99	99	99	99	99	99	99	99	99	99	99	99	99	99	99	99	99	99	99	99	99
463	NT13-30-463	3	1	2	3	3	1	2	2	1	1	4	2	3	2	2	2	2	2	1	5	2	2	腰痛，焦慮及抑鬱症	2	88	3	1	88	88	88	88	88	88	88	88	88	0	0	6	1	6	3	6	1	3	1	6	2
464	NT13-30-464	99	99	99	99	99	99	99	99	99	99	99	99	99	99	99	99	99	99	99	99	99	99	99	99	99	99	99	99	99	99	99	99	99	99	99	99	99	99	99	99	99	99	99	99	99	99	99	99
465	NT13-30-465	99	99	99	99	99	99	99	99	99	99	99	99	99	99	99	99	99	99	99	99	99	99	99	99	99	99	99	99	99	99	99	99	99	99	99	99	99	99	99	99	99	99	99	99	99	99	99	99
466	NT13-30-466	3	1	2	3	4	4	2	1	1	1	2	2	2	2	2	3	5	5	1	5	2	1	88	1	88	2	1	88	88	88	88	88	88	88	88	88	0	0	6	1	5	1	4	0.5	2	0.5	6	1
467	NT13-30-467	2	1	1	4	4	4	1	1	1	2	2	3	3	2	2	3	4	4	1	5	1	1	88	1	88	2	1	88	88	88	88	88	88	88	88	88	1	50	6	1	6	2	4	1	2	1	5	2
468	NT13-30-468	99	99	99	99	99	99	99	99	99	99	99	99	99	99	99	99	99	99	99	99	99	99	99	99	99	99	99	99	99	99	99	99	99	99	99	99	99	99	99	99	99	99	99	99	99	99	99	99
469	NT13-30-469	99	99	99	99	99	99	99	99	99	99	99	99	99	99	99	99	99	99	99	99	99	99	99	99	99	99	99	99	99	99	99	99	99	99	99	99	99	99	99	99	99	99	99	99	99	99	99	99
470	NT13-30-470	3	1	1	4	3	3	4	2	1	1	2	3	2	1	2	1	4	4	1	5	1	2	皮膚敏感	4	trental, chlorpheniramine	3	2	0	0	0	0	0	1	1	0		0	0	6	1	5	1.5	5	1	2	1	5	4
471	NT13-30-471	99	99	99	99	99	99	99	99	99	99	99	99	99	99	99	99	99	99	99	99	99	99	99	99	99	99	99	99	99	99	99	99	99	99	99	99	99	99	99	99	99	99	99	99	99	99	99	99
472	NT13-30-472	99	99	99	99	99	99	99	99	99	99	99	99	99	99	99	99	99	99	99	99	99	99	99	99	99	99	99	99	99	99	99	99	99	99	99	99	99	99	99	99	99	99	99	99	99	99	99	99
473	NT13-31-473	99	99	99	99	99	99	99	99	99	99	99	99	99	99	99	99	99	99	99	99	99	99	99	99	99	99	99	99	99	99	99	99	99	99	99	99	99	99	99	99	99	99	99	99	99	99	99	99
474	NT13-31-474	99	99	99	99	99	99	99	99	99	99	99	99	99	99	99	99	99	99	99	99	99	99	99	99	99	99	99	99	99	99	99	99	99	99	99	99	99	99	99	99	99	99	99	99	99	99	99	99
475	NT13-31-475	99	99	99	99	99	99	99	99	99	99	99	99	99	99	99	99	99	99	99	99	99	99	99	99	99	99	99	99	99	99	99	99	99	99	99	99	99	99	99	99	99	99	99	99	99	99	99	99
476	NT13-31-476	99	99	99	99	99	99	99	99	99	99	99	99	99	99	99	99	99	99	99	99	99	99	99	99	99	99	99	99	99	99	99	99	99	99	99	99	99	99	99	99	99	99	99	99	99	99	99	99
477	NT13-31-477	99	99	99	99	99	99	99	99	99	99	99	99	99	99	99	99	99	99	99	99	99	99	99	99	99	99	99	99	99	99	99	99	99	99	99	99	99	99	99	99	99	99	99	99	99	99	99	99
478	NT13-31-478	99	99	99	99	99	99	99	99	99	99	99	99	99	99	99	99	99	99	99	99	99	99	99	99	99	99	99	99	99	99	99	99	99	99	99	99	99	99	99	99	99	99	99	99	99	99	99	99
479	NT13-31-479	99	99	99	99	99	99	99	99	99	99	99	99	99	99	99	99	99	99	99	99	99	99	99	99	99	99	99	99	99	99	99	99	99	99	99	99	99	99	99	99	99	99	99	99	99	99	99	99
480	NT13-31-480	99	99	99	99	99	99	99	99	99	99	99	99	99	99	99	99	99	99	99	99	99	99	99	99	99	99	99	99	99	99	99	99	99	99	99	99	99	99	99	99	99	99	99	99	99	99	99	99
481	NT13-31-481	2	3	2	4	3	4	2	2	1	2	2	5	3	2	2	4	5	4	1	5	2	1	88	1	88	3	1	88	88	88	88	88	88	88	88	88	0	0	6	0.5	5	0.5	2	1	2	1	6	3
482	NT13-31-482	99	99	99	99	99	99	99	99	99	99	99	99	99	99	99	99	99	99	99	99	99	99	99	99	99	99	99	99	99	99	99	99	99	99	99	99	99	99	99	99	99	99	99	99	99	99	99	99
483	NT13-31-483	99	99	99	99	99	99	99	99	99	99	99	99	99	99	99	99	99	99	99	99	99	99	99	99	99	99	99	99	99	99	99	99	99	99	99	99	99	99	99	99	99	99	99	99	99	99	99	99
484	NT13-31-484	99	99	99	99	99	99	99	99	99	99	99	99	99	99	99	99	99	99	99	99	99	99	99	99	99	99	99	99	99	99	99	99	99	99	99	99	99	99	99	99	99	99	99	99	99	99	99	99
485	NT13-32-485	99	99	99	99	99	99	99	99	99	99	99	99	99	99	99	99	99	99	99	99	99	99	99	99	99	99	99	99	99	99	99	99	99	99	99	99	99	99	99	99	99	99	99	99	99	99	99	99
486	NT13-32-486	3	1	1	4	4	1	3	1	1	1	1	3	1	1	1	2	5	5	1	5	1	1	88	1	88	3	1	88	88	88	88	88	88	88	88	88	0	0	6	2	5	2	6	1	3	1	6	1
487	NT13-32-487	99	99	99	99	99	99	99	99	99	99	99	99	99	99	99	99	99	99	99	99	99	99	99	99	99	99	99	99	99	99	99	99	99	99	99	99	99	99	99	99	99	99	99	99	99	99	99	99
488	NT13-32-488	99	99	99	99	99	99	99	99	99	99	99	99	99	99	99	99	99	99	99	99	99	99	99	99	99	99	99	99	99	99	99	99	99	99	99	99	99	99	99	99	99	99	99	99	99	99	99	99
489	NT13-32-489	99	99	99	99	99	99	99	99	99	99	99	99	99	99	99	99	99	99	99	99	99	99	99	99	99	99	99	99	99	99	99	99	99	99	99	99	99	99	99	99	99	99	99	99	99	99	99	99
490	NT13-32-490	99	99	99	99	99	99	99	99	99	99	99	99	99	99	99	99	99	99	99	99	99	99	99	99	99	99	99	99	99	99	99	99	99	99	99	99	99	99	99	99	99	99	99	99	99	99	99	99
491	NT13-32-491	99	99	99	99	99	99	99	99	99	99	99	99	99	99	99	99	99	99	99	99	99	99	99	99	99	99	99	99	99	99	99	99	99	99	99	99	99	99	99	99	99	99	99	99	99	99	99	99
492	NT13-32-492	99	99	99	99	99	99	99	99	99	99	99	99	99	99	99	99	99	99	99	99	99	99	99	99	99	99	99	99	99	99	99	99	99	99	99	99	99	99	99	99	99	99	99	99	99	99	99	99
493	NT13-32-493	99	99	99	99	99	99	99	99	99	99	99	99	99	99	99	99	99	99	99	99	99	99	99	99	99	99	99	99	99	99	99	99	99	99	99	99	99	99	99	99	99	99	99	99	99	99	99	99
494	NT13-32-494	3	1	2	4	4	4	1	1	1	1	2	3	2	1	2	3	2	1	2	5	1	1	88	1	88	3	1	88	88	88	88	88	88	88	88	88	0	0	6	1	6	2	4	1	2	1	2	2
495	NT13-32-495	3	1	1	4	2	4	1	2	1	2	2	2	2	2	2	2	5	5	2	5	1	1	88	1	88	3	1	88	88	88	88	88	88	88	88	88	7	85	6	1	5	1	6	1	3	1	6	2
496	NT13-32-496	99	99	99	99	99	99	99	99	99	99	99	99	99	99	99	99	99	99	99	99	99	99	99	99	99	99	99	99	99	99	99	99	99	99	99	99	99	99	99	99	99	99	99	99	99	99	99	99
497	NT13-32-497	99	99	99	99	99	99	99	99	99	99	99	99	99	99	99	99	99	99	99	99	99	99	99	99	99	99	99	99	99	99	99	99	99	99	99	99	99	99	99	99	99	99	99	99	99	99	99	99
498	NT13-32-498	3	1	2	3	3	3	1	2	1	1	2	4	4	2	2	5	4	2	1	5	2	1	88	1	88	3	1	88	88	88	88	88	88	88	88	88	0	0	5	1	5	2	4	2	3	1	5	1
499	NT13-32-499	3	1	2	4	4	4	2	2	1	1	2	3	2	2	2	2	3	2	1	5	1	1	88	1	88	3	2	0	0	0	0	1	0	0	0		0	0	6	1	6	1	5	2	2	1	6	3-5
500	NT13-32-500	2	3	2	4	4	3	2	1	1	1	1	1	1	1	2	2	5	4	1	5	1	1	88	1	88	3	1	88	88	88	88	88	88	88	88	88	0	0	4	0.5	4	1	3	1	2	1	4	3
501	NT13-32-501	99	99	99	99	99	99	99	99	99	99	99	99	99	99	99	99	99	99	99	99	99	99	99	99	99	99	99	99	99	99	99	99	99	99	99	99	99	99	99	99	99	99	99	99	99	99	99	99
502	NT13-32-502	99	99	99	99	99	99	99	99	99	99	99	99	99	99	99	99	99	99	99	99	99	99	99	99	99	99	99	99	99	99	99	99	99	99	99	99	99	99	99	99	99	99	99	99	99	99	99	99
503	NT13-32-503	3	4	2	2	3	3	3	2	1	2	2	4	3	2	2	3	5	4	1	5	1	1	88	1	88	3	1	88	88	88	88	88	88	88	88	88	1	99	6	1	5	1	4	1	2	1	6	1
504	NT13-32-504	3	3	1	4	4	3	2	1	1	1	2	4	4	2	2	4	5	3	1	5	1	1	88	4	感冒藥	3	2	0	0	0	0	0	0	1	0		0	0	6	1	4	0.5	3	0.5	2	0.5	6	3
505	NT13-32-505	99	99	99	99	99	99	99	99	99	99	99	99	99	99	99	99	99	99	99	99	99	99	99	99	99	99	99	99	99	99	99	99	99	99	99	99	99	99	99	99	99	99	99	99	99	99	99	99
506	NT13-32-506	2	1	1	1	2	3	1	2	2	2	2	2	2	2	2	3	4	2	4	5	2	2	血糖高， 血壓高	4	99	3	1	88	88	88	88	88	88	88	88	88	2	100	3	1	6	2	3	1	2	1	6	1
507	NT13-32-507	99	99	99	99	99	99	99	99	99	99	99	99	99	99	99	99	99	99	99	99	99	99	99	99	99	99	99	99	99	99	99	99	99	99	99	99	99	99	99	99	99	99	99	99	99	99	99	99
508	NT13-32-508	3	3	2	1	3	1	2	1	1	1	2	3	3	2	2	2	4	3	2	5	2	1	88	1	88	2	1	88	88	88	88	88	88	88	88	88	0	0	5	1	5	2	5	1	3	1	5	2
509	NT13-32-509	3	3	1	4	1	3	2	1	1	1	2	3	3	2	2	3	4	4	1	5	2	1	88	1	88	2	1	88	88	88	88	88	88	88	88	88	0	0	6	1	5	2	5	2	5	1	5	2
510	NT13-32-510	99	99	99	99	99	99	99	99	99	99	99	99	99	99	99	99	99	99	99	99	99	99	99	99	99	99	99	99	99	99	99	99	99	99	99	99	99	99	99	99	99	99	99	99	99	99	99	99
511	NT14-33-511	99	99	99	99	99	99	99	99	99	99	99	99	99	99	99	99	99	99	99	99	99	99	99	99	99	99	99	99	99	99	99	99	99	99	99	99	99	99	99	99	99	99	99	99	99	99	99	99
512	NT14-33-512	99	99	99	99	99	99	99	99	99	99	99	99	99	99	99	99	99	99	99	99	99	99	99	99	99	99	99	99	99	99	99	99	99	99	99	99	99	99	99	99	99	99	99	99	99	99	99	99
513	NT14-33-513	99	99	99	99	99	99	99	99	99	99	99	99	99	99	99	99	99	99	99	99	99	99	99	99	99	99	99	99	99	99	99	99	99	99	99	99	99	99	99	99	99	99	99	99	99	99	99	99
514	NT14-33-514	3	1	2	4	4	4	1	1	1	2	4	5	3	2	2	4	5	4	1	5	1	1	88	4	感冒藥，止痛藥	1	1	88	88	88	88	88	88	88	88	88	0	0	6	1	6	1	5	1	2	1/3	6	2
515	NT14-33-515	99	99	99	99	99	99	99	99	99	99	99	99	99	99	99	99	99	99	99	99	99	99	99	99	99	99	99	99	99	99	99	99	99	99	99	99	99	99	99	99	99	99	99	99	99	99	99	99
516	NT14-33-516	99	99	99	99	99	99	99	99	99	99	99	99	99	99	99	99	99	99	99	99	99	99	99	99	99	99	99	99	99	99	99	99	99	99	99	99	99	99	99	99	99	99	99	99	99	99	99	99
517	NT14-33-517	99	99	99	99	99	99	99	99	99	99	99	99	99	99	99	99	99	99	99	99	99	99	99	99	99	99	99	99	99	99	99	99	99	99	99	99	99	99	99	99	99	99	99	99	99	99	99	99
518	NT14-33-518	99	99	99	99	99	99	99	99	99	99	99	99	99	99	99	99	99	99	99	99	99	99	99	99	99	99	99	99	99	99	99	99	99	99	99	99	99	99	99	99	99	99	99	99	99	99	99	99
519	NT14-33-519	3	1	2	3	3	4	1	1	1	1	1	3	1	2	2	2	5	4	1	5	1	1	88	4	暈浪藥	2	1	88	88	88	88	88	88	88	88	88	0	0	6	0.5	6	2	5	1	2	1	6	2
520	NT14-33-520	3	1	1	4	1	4	2	2	1	99	99	99	99	99	99	99	99	99	99	99	99	99	99	99	99	99	1	88	88	88	88	88	88	88	88	88	99	99	6	1	3	1	5	1	3	1	5	2
521	NT14-33-521	99	99	99	99	99	99	99	99	99	99	99	99	99	99	99	99	99	99	99	99	99	99	99	99	99	99	99	99	99	99	99	99	99	99	99	99	99	99	99	99	99	99	99	99	99	99	99	99
522	NT14-33-522	99	99	99	99	99	99	99	99	99	99	99	99	99	99	99	99	99	99	99	99	99	99	99	99	99	99	99	99	99	99	99	99	99	99	99	99	99	99	99	99	99	99	99	99	99	99	99	99
523	NT14-33-523	4	1	1	3	3	1	2	2	1	1	2	3	4	2	2	2	2	2	1	5	2	2	失眠	4	失眠中藥	2	2	1	0	0	0	0	0	0	0	0	99	99	3	1	5	2-3	6	2	1	0	4	4
524	NT14-33-524	3	1	1	3	3	1	2	1	1	1	2	3	1	2	2	2	4	2	1	5	1	1	88	4	感冒藥	3	1	88	88	88	88	88	88	88	88	88	0	0	5	1	5	1	5	1	2	1	4	1
525	NT14-33-525	99	99	99	99	99	99	99	99	99	99	99	99	99	99	99	99	99	99	99	99	99	99	99	99	99	99	99	99	99	99	99	99	99	99	99	99	99	99	99	99	99	99	99	99	99	99	99	99
526	NT14-33-526	3	1	2	4	4	4	1	1	1	1	2	3	2	1	2	2	4	4	1	5	1	2	高血壓	1	88	1	1	88	88	88	88	88	88	88	88	88	8	99	6	1	6	1	5	1	1	0	6	1
527	NT14-34-527	99	99	99	99	99	99	99	99	99	99	99	99	99	99	99	99	99	99	99	99	99	99	99	99	99	99	99	99	99	99	99	99	99	99	99	99	99	99	99	99	99	99	99	99	99	99	99	99
528	NT14-34-528	99	99	99	99	99	99	99	99	99	99	99	99	99	99	99	99	99	99	99	99	99	99	99	99	99	99	99	99	99	99	99	99	99	99	99	99	99	99	99	99	99	99	99	99	99	99	99	99
529	NT14-34-529	99	99	99	99	99	99	99	99	99	99	99	99	99	99	99	99	99	99	99	99	99	99	99	99	99	99	99	99	99	99	99	99	99	99	99	99	99	99	99	99	99	99	99	99	99	99	99	99
530	NT14-34-530	3	3	1	3	4	4	3	2	4	1	2	5	5	2	2	4	4	1	2	5	2	1	88	4	中藥和止痛藥	99	1	88	88	88	88	88	88	88	88	88	8	99	3	1	5	1	2	0.5	2	1	2	1
531	NT14-34-531	99	99	99	99	99	99	99	99	99	99	99	99	99	99	99	99	99	99	99	99	99	99	99	99	99	99	99	99	99	99	99	99	99	99	99	99	99	99	99	99	99	99	99	99	99	99	99	99
532	NT14-34-532	99	99	99	99	99	99	99	99	99	99	99	99	99	99	99	99	99	99	99	99	99	99	99	99	99	99	99	99	99	99	99	99	99	99	99	99	99	99	99	99	99	99	99	99	99	99	99	99
533	NT14-34-533	99	99	99	99	99	99	99	99	99	99	99	99	99	99	99	99	99	99	99	99	99	99	99	99	99	99	99	99	99	99	99	99	99	99	99	99	99	99	99	99	99	99	99	99	99	99	99	99
534	NT14-34-534	99	99	99	99	99	99	99	99	99	99	99	99	99	99	99	99	99	99	99	99	99	99	99	99	99	99	99	99	99	99	99	99	99	99	99	99	99	99	99	99	99	99	99	99	99	99	99	99
535	NT14-35-535	99	99	99	99	99	99	99	99	99	99	99	99	99	99	99	99	99	99	99	99	99	99	99	99	99	99	99	99	99	99	99	99	99	99	99	99	99	99	99	99	99	99	99	99	99	99	99	99
536	NT14-35-536	99	99	99	99	99	99	99	99	99	99	99	99	99	99	99	99	99	99	99	99	99	99	99	99	99	99	99	99	99	99	99	99	99	99	99	99	99	99	99	99	99	99	99	99	99	99	99	99
537	NT14-35-537	99	99	99	99	99	99	99	99	99	99	99	99	99	99	99	99	99	99	99	99	99	99	99	99	99	99	99	99	99	99	99	99	99	99	99	99	99	99	99	99	99	99	99	99	99	99	99	99
538	NT14-35-538	99	99	99	99	99	99	99	99	99	99	99	99	99	99	99	99	99	99	99	99	99	99	99	99	99	99	99	99	99	99	99	99	99	99	99	99	99	99	99	99	99	99	99	99	99	99	99	99
539	NT14-35-539	99	99	99	99	99	99	99	99	99	99	99	99	99	99	99	99	99	99	99	99	99	99	99	99	99	99	99	99	99	99	99	99	99	99	99	99	99	99	99	99	99	99	99	99	99	99	99	99
540	NT14-35-540	99	99	99	99	99	99	99	99	99	99	99	99	99	99	99	99	99	99	99	99	99	99	99	99	99	99	99	99	99	99	99	99	99	99	99	99	99	99	99	99	99	99	99	99	99	99	99	99
541	NT14-35-541	99	99	99	99	99	99	99	99	99	99	99	99	99	99	99	99	99	99	99	99	99	99	99	99	99	99	99	99	99	99	99	99	99	99	99	99	99	99	99	99	99	99	99	99	99	99	99	99
542	NT14-36-542	99	99	99	99	99	99	99	99	99	99	99	99	99	99	99	99	99	99	99	99	99	99	99	99	99	99	99	99	99	99	99	99	99	99	99	99	99	99	99	99	99	99	99	99	99	99	99	99
543	NT14-36-543	99	99	99	99	99	99	99	99	99	99	99	99	99	99	99	99	99	99	99	99	99	99	99	99	99	99	99	99	99	99	99	99	99	99	99	99	99	99	99	99	99	99	99	99	99	99	99	99
544	NT14-36-544	99	99	99	99	99	99	99	99	99	99	99	99	99	99	99	99	99	99	99	99	99	99	99	99	99	99	99	99	99	99	99	99	99	99	99	99	99	99	99	99	99	99	99	99	99	99	99	99
545	NT14-36-545	3	4	2	3	4	4	1	1	1	1	2	3	1	2	2	2	5	1	1	5	2	2	耳水不平衡， 網球手， 胃酸倒流， 皮膚敏感	2	88	3	1	88	88	88	88	88	88	88	88	88	0	0	7	1	6	2	5	1.5	2	0.5	6	1
546	NT14-36-546	99	99	99	99	99	99	99	99	99	99	99	99	99	99	99	99	99	99	99	99	99	99	99	99	99	99	99	99	99	99	99	99	99	99	99	99	99	99	99	99	99	99	99	99	99	99	99	99
547	NT14-36-547	2	1	2	3	3	2	3	1	1	1	3	4	4	2	2	4	4	4	1	5	2	2	糖尿病	4	糖尿藥， 降膽固醇藥， 降血壓藥	3	1	88	88	88	88	88	88	88	88	88	1	99	6	1	6	2-3	4	1	2	1	6	2
548	NT14-36-548	99	99	99	99	99	99	99	99	99	99	99	99	99	99	99	99	99	99	99	99	99	99	99	99	99	99	99	99	99	99	99	99	99	99	99	99	99	99	99	99	99	99	99	99	99	99	99	99
549	NT14-36-549	99	99	99	99	99	99	99	99	99	99	99	99	99	99	99	99	99	99	99	99	99	99	99	99	99	99	99	99	99	99	99	99	99	99	99	99	99	99	99	99	99	99	99	99	99	99	99	99
550	NT14-36-550	3	1	1	4	3	4	1	1	1	1	2	3	2	2	2	5	5	5	1	5	2	1	88	1	88	2	1	88	88	88	88	88	88	88	88	88	0	0	6	1	5	1	2	1	6	1	3	1
551	NT14-36-551	3	1	2	4	4	4	1	1	1	1	1	2	1	2	2	3	5	4	1	5	1	1	88	1	88	3	1	88	88	88	88	88	88	88	88	88	0	0	6	2	6	2	4	1	2	1	6	3
552	NT14-36-552	99	99	99	99	99	99	99	99	99	99	99	99	99	99	99	99	99	99	99	99	99	99	99	99	99	99	99	99	99	99	99	99	99	99	99	99	99	99	99	99	99	99	99	99	99	99	99	99
553	NT14-36-553	99	99	99	99	99	99	99	99	99	99	99	99	99	99	99	99	99	99	99	99	99	99	99	99	99	99	99	99	99	99	99	99	99	99	99	99	99	99	99	99	99	99	99	99	99	99	99	99
554	NT14-36-554	99	99	99	99	99	99	99	99	99	99	99	99	99	99	99	99	99	99	99	99	99	99	99	99	99	99	99	99	99	99	99	99	99	99	99	99	99	99	99	99	99	99	99	99	99	99	99	99
555	NT14-36-555	3	1	1	4	3	2	2	1	1	4	4	3	3	2	2	2	4	4	2	5	1	1	88	4	頭痛藥	3	1	88	88	88	88	88	88	88	88	88	1	99	6	1	5	1	6	1	2	1	6	2
556	NT14-36-556	99	99	99	99	99	99	99	99	99	99	99	99	99	99	99	99	99	99	99	99	99	99	99	99	99	99	99	99	99	99	99	99	99	99	99	99	99	99	99	99	99	99	99	99	99	99	99	99
557	NT14-36-557	99	99	99	99	99	99	99	99	99	99	99	99	99	99	99	99	99	99	99	99	99	99	99	99	99	99	99	99	99	99	99	99	99	99	99	99	99	99	99	99	99	99	99	99	99	99	99	99
558	NT14-36-558	3	1	1	3	4	4	2	1	1	1	2	2	2	2	2	2	4	4	1	5	1	2	糖尿	4	糖尿藥	2	1	88	88	88	88	88	88	88	88	88	0	0	4	1	4	2	5	1	2	1	4	3
559	NT15-37-559	99	99	99	99	99	99	99	99	99	99	99	99	99	99	99	99	99	99	99	99	99	99	99	99	99	99	99	99	99	99	99	99	99	99	99	99	99	99	99	99	99	99	99	99	99	99	99	99
560	NT15-37-560	99	99	99	99	99	99	99	99	99	99	99	99	99	99	99	99	99	99	99	99	99	99	99	99	99	99	99	99	99	99	99	99	99	99	99	99	99	99	99	99	99	99	99	99	99	99	99	99
561	NT15-37-561	99	99	99	99	99	99	99	99	99	99	99	99	99	99	99	99	99	99	99	99	99	99	99	99	99	99	99	99	99	99	99	99	99	99	99	99	99	99	99	99	99	99	99	99	99	99	99	99
562	NT15-37-562	99	99	99	99	99	99	99	99	99	99	99	99	99	99	99	99	99	99	99	99	99	99	99	99	99	99	99	99	99	99	99	99	99	99	99	99	99	99	99	99	99	99	99	99	99	99	99	99
563	NT15-37-563	99	99	99	99	99	99	99	99	99	99	99	99	99	99	99	99	99	99	99	99	99	99	99	99	99	99	99	99	99	99	99	99	99	99	99	99	99	99	99	99	99	99	99	99	99	99	99	99
564	NT15-38-564	99	99	99	99	99	99	99	99	99	99	99	99	99	99	99	99	99	99	99	99	99	99	99	99	99	99	99	99	99	99	99	99	99	99	99	99	99	99	99	99	99	99	99	99	99	99	99	99
565	NT15-38-565	99	99	99	99	99	99	99	99	99	99	99	99	99	99	99	99	99	99	99	99	99	99	99	99	99	99	99	99	99	99	99	99	99	99	99	99	99	99	99	99	99	99	99	99	99	99	99	99
566	NT15-38-566	99	99	99	99	99	99	99	99	99	99	99	99	99	99	99	99	99	99	99	99	99	99	99	99	99	99	99	99	99	99	99	99	99	99	99	99	99	99	99	99	99	99	99	99	99	99	99	99
567	NT15-38-567	99	99	99	99	99	99	99	99	99	99	99	99	99	99	99	99	99	99	99	99	99	99	99	99	99	99	99	99	99	99	99	99	99	99	99	99	99	99	99	99	99	99	99	99	99	99	99	99
568	NT15-38-568	99	99	99	99	99	99	99	99	99	99	99	99	99	99	99	99	99	99	99	99	99	99	99	99	99	99	99	99	99	99	99	99	99	99	99	99	99	99	99	99	99	99	99	99	99	99	99	99
569	NT15-38-569	99	99	99	99	99	99	99	99	99	99	99	99	99	99	99	99	99	99	99	99	99	99	99	99	99	99	99	99	99	99	99	99	99	99	99	99	99	99	99	99	99	99	99	99	99	99	99	99
570	NT15-38-570	3	1	2	4	4	2	1	1	1	2	1	3	5	2	2	3	5	5	2	5	1	1	88	1	88	2	1	88	88	88	88	88	88	88	88	88	0	0	5	1	5	1	5	1	2	1	5	1
571	NT15-38-571	99	99	99	99	99	99	99	99	99	99	99	99	99	99	99	99	99	99	99	99	99	99	99	99	99	99	99	99	99	99	99	99	99	99	99	99	99	99	99	99	99	99	9+AT572:AW6059	99	99	99	99	99
572	NT15-38-572	99	99	99	99	99	99	99	99	99	99	99	99	99	99	99	99	99	99	99	99	99	99	99	99	99	99	99	99	99	99	99	99	99	99	99	99	99	99	99	99	99	99	99	99	99	99	99	99
573	NT15-38-573	99	99	99	99	99	99	99	99	99	99	99	99	99	99	99	99	99	99	99	99	99	99	99	99	99	99	99	99	99	99	99	99	99	99	99	99	99	99	99	99	99	99	99	99	99	99	99	99
574	NT15-38-574	99	99	99	99	99	99	99	99	99	99	99	99	99	99	99	99	99	99	99	99	99	99	99	99	99	99	99	99	99	99	99	99	99	99	99	99	99	99	99	99	99	99	99	99	99	99	99	99
575	NT16-39-575	99	99	99	99	99	99	99	99	99	99	99	99	99	99	99	99	99	99	99	99	99	99	99	99	99	99	99	99	99	99	99	99	99	99	99	99	99	99	99	99	99	99	99	99	99	99	99	99
576	NT16-39-576	99	99	99	99	99	99	99	99	99	99	99	99	99	99	99	99	99	99	99	99	99	99	99	99	99	99	99	99	99	99	99	99	99	99	99	99	99	99	99	99	99	99	99	99	99	99	99	99
577	NT16-39-577	99	99	99	99	99	99	99	99	99	99	99	99	99	99	99	99	99	99	99	99	99	99	99	99	99	99	99	99	99	99	99	99	99	99	99	99	99	99	99	99	99	99	99	99	99	99	99	99
578	NT16-39-578	3	3	2	4	4	1	2	1	1	1	2	3	3	2	2	2	4	5	1	5	1	1	88	1	88	3	1	88	88	88	88	88	88	88	88	88	0	0	6	1-2	6	1	6	1	6	1	6	2
579	NT16-39-579	99	99	99	99	99	99	99	99	99	99	99	99	99	99	99	99	99	99	99	99	99	99	99	99	99	99	99	99	99	99	99	99	99	99	99	99	99	99	99	99	99	99	99	99	99	99	99	99
580	NT16-39-580	99	99	99	99	99	99	99	99	99	99	99	99	99	99	99	99	99	99	99	99	99	99	99	99	99	99	99	99	99	99	99	99	99	99	99	99	99	99	99	99	99	99	99	99	99	99	99	99
581	NT16-39-581	99	99	99	99	99	99	99	99	99	99	99	99	99	99	99	99	99	99	99	99	99	99	99	99	99	99	99	99	99	99	99	99	99	99	99	99	99	99	99	99	99	99	99	99	99	99	99	99
582	NT16-40-582	3	1	2	3	4	3	1	2	1	1	2	3	3	2	2	3	4	4	1	1	1	2	糖尿病， 哮喘	2&4	糖尿藥	3	2	0	0	0	0	0	1	1	1	橙。 龍眼	4	100	6	1	4	1	3	1	3	1	6	2
583	NT16-40-583	99	99	99	99	99	99	99	99	99	99	99	99	99	99	99	99	99	99	99	99	99	99	99	99	99	99	99	99	99	99	99	99	99	99	99	99	99	99	99	99	99	99	99	99	99	99	99	99
584	NT16-40-584	99	99	99	99	99	99	99	99	99	99	99	99	99	99	99	99	99	99	99	99	99	99	99	99	99	99	99	99	99	99	99	99	99	99	99	99	99	99	99	99	99	99	99	99	99	99	99	99
585	NT16-40-585	99	99	99	99	99	99	99	99	99	99	99	99	99	99	99	99	99	99	99	99	99	99	99	99	99	99	99	99	99	99	99	99	99	99	99	99	99	99	99	99	99	99	99	99	99	99	99	99
586	NT16-40-586	99	99	99	99	99	99	99	99	99	99	99	99	99	99	99	99	99	99	99	99	99	99	99	99	99	99	99	99	99	99	99	99	99	99	99	99	99	99	99	99	99	99	99	99	99	99	99	99
587	NT16-40-587	99	99	99	99	99	99	99	99	99	99	99	99	99	99	99	99	99	99	99	99	99	99	99	99	99	99	99	99	99	99	99	99	99	99	99	99	99	99	99	99	99	99	99	99	99	99	99	99
588	NT16-40-588	3	1	1	3	3	1	2	2	1	2	2	2	4	2	2	2	5	5	1	5	1	1	88	4	必理痛	3	1	88	88	88	88	88	88	88	88	88	0	0	5	1	6	2	6	2	4	1	4	2
589	NT16-40-589	3	1	2	3	4	1	3	2	1	2	2	3	1	2	2	2	4	5	1	5	1	1	88	4	消炎止痛藥	2	1	88	88	88	88	88	88	88	88	88	0	0	6	0.5	6	1	5	1	2	1	5	1
590	NT16-40-590	99	99	99	99	99	99	99	99	99	99	99	99	99	99	99	99	99	99	99	99	99	99	99	99	99	99	99	99	99	99	99	99	99	99	99	99	99	99	99	99	99	99	99	99	99	99	99	99
591	NT16-40-591	99	99	99	99	99	99	99	99	99	99	99	99	99	99	99	99	99	99	99	99	99	99	99	99	99	99	99	99	99	99	99	99	99	99	99	99	99	99	99	99	99	99	99	99	99	99	99	99
592	NT16-40-592	99	99	99	99	99	99	99	99	99	99	99	99	99	99	99	99	99	99	99	99	99	99	99	99	99	99	99	99	99	99	99	99	99	99	99	99	99	99	99	99	99	99	99	99	99	99	99	99
593	NT16-40-593	3	2	2	2	4	3	2	1	1	1	2	2	1	2	2	3	4	3	1	5	1	1	88	4	降膽固醇藥	3	1	88	88	88	88	88	88	88	88	88	0	0	6	2	6	2	5	1	2	1	6	3
594	NT16-40-594	3	1	1	4	4	4	3	1	1	1	2	3	3	2	2	1	3	3	4	5	2	1	88	1	88	3	1	88	88	88	88	88	88	88	88	88	1	30	6	2	5	3	5	1	2	1	6	2
595	NT16-40-595	3	1	2	3	2	1	3	1	1	1	2	3	1	2	2	2	1	2	1	5	1	1	88	1	88	3	1	88	88	88	88	88	88	88	88	88	0	0	6	1	5	1	4	1	2	1	6	2
596	NT16-40-596	99	99	99	99	99	99	99	99	99	99	99	99	99	99	99	99	99	99	99	99	99	99	99	99	99	99	99	99	99	99	99	99	99	99	99	99	99	99	99	99	99	99	99	99	99	99	99	99
597	NT16-40-597	99	99	99	99	99	99	99	99	99	99	99	99	99	99	99	99	99	99	99	99	99	99	99	99	99	99	99	99	99	99	99	99	99	99	99	99	99	99	99	99	99	99	99	99	99	99	99	99
598	NT16-40-598	99	99	99	99	99	99	99	99	99	99	99	99	99	99	99	99	99	99	99	99	99	99	99	99	99	99	99	99	99	99	99	99	99	99	99	99	99	99	99	99	99	99	99	99	99	99	99	99
599	NT16-40-599	3	1	2	3	4	3	2	1	1	2	1	3	1	2	2	3	4	4	1	5	2	1	88	4	必理痛	4	1	88	88	88	88	88	88	88	88	88	0	0	6	1	5	4-6	5	1-2	2	0.5	5	1-2
600	NT16-40-600	99	99	99	99	99	99	99	99	99	99	99	99	99	99	99	99	99	99	99	99	99	99	99	99	99	99	99	99	99	99	99	99	99	99	99	99	99	99	99	99	99	99	99	99	99	99	99	99
601	NT16-40-601	3	1	2	4	2	4	2	2	1	2	2	3	2	2	2	4	4	4	1	5	2	1	88	1	88	4	1	88	88	88	88	88	88	88	88	88	8	99	4	4	4	2	4	1	3	1	3	1
602	NT16-40-602	99	99	99	99	99	99	99	99	99	99	99	99	99	99	99	99	99	99	99	99	99	99	99	99	99	99	99	99	99	99	99	99	99	99	99	99	99	99	99	99	99	99	99	99	99	99	99	99
603	NT16-40-603	3	1	2	4	4	1	2	1	1	1	2	3	4	2	2	2	99	99	99	99	99	99	99	99	99	99	2	1	0	0	0	0	1	0	0		0	0	6	1	6	2	5	1	2	1	6	2-3
604	NT16-40-604	99	99	99	99	99	99	99	99	99	99	99	99	99	99	99	99	99	99	99	99	99	99	99	99	99	99	99	99	99	99	99	99	99	99	99	99	99	99	99	99	99	99	99	99	99	99	99	99
605	NT16-40-605	99	99	99	99	99	99	99	99	99	99	99	99	99	99	99	99	99	99	99	99	99	99	99	99	99	99	99	99	99	99	99	99	99	99	99	99	99	99	99	99	99	99	99	99	99	99	99	99
606	NT16-40-606	3	1	2	4	3	1	1	1	1	1	2	2	1	1	1	2	4	2	1	5	1	1	88	1	88	2	1	88	88	88	88	88	88	88	88	88	99	99	6	1	4	1-2	5	1	2	1	6	2-3
607	NT16-41-607	99	99	99	99	99	99	99	99	99	99	99	99	99	99	99	99	99	99	99	99	99	99	99	99	99	99	99	99	99	99	99	99	99	99	99	99	99	99	99	99	99	99	99	99	99	99	99	99
608	NT16-41-608	3	4	2	4	4	4	1	2	1	1	2	3	4	1	2	2	3	3	1	5	2	1	88	1	88	3	1	88	88	88	88	88	88	88	88	88	1	100	6	2	6	1	6	1	3	1	6	1
609	NT16-41-609	99	99	99	99	99	99	99	99	99	99	99	99	99	99	99	99	99	99	99	99	99	99	99	99	99	99	99	99	99	99	99	99	99	99	99	99	99	99	99	99	99	99	99	99	99	99	99	99
610	NT16-41-610	2	1	1	3	3	3	2	1	1	1	1	3	2	2	2	3	3	5	1	5	1	1	88	2	88	3	2	1	0	0	0	0	1	0	0		0	0	6	1	6	2	3	1	2	0.5	6	2
611	NT16-41-611	3	1	1	4	3	1	2	1	4	2	2	4	3	1	1	2	5	5	1	5	1	2	高血壓	4	降血壓藥	4	1	88	88	88	88	88	88	88	88	88	0	0	6	2	6	2	4	1	1	0	6	4
612	NT16-41-612	99	99	99	99	99	99	99	99	99	99	99	99	99	99	99	99	99	99	99	99	99	99	99	99	99	99	99	99	99	99	99	99	99	99	99	99	99	99	99	99	99	99	99	99	99	99	99	99
613	NT16-41-613	99	99	99	99	99	99	99	99	99	99	99	99	99	99	99	99	99	99	99	99	99	99	99	99	99	99	99	99	99	99	99	99	99	99	99	99	99	99	99	99	99	99	99	99	99	99	99	99
614	NT16-41-614	99	99	99	99	99	99	99	99	99	99	99	99	99	99	99	99	99	99	99	99	99	99	99	99	99	99	99	99	99	99	99	99	99	99	99	99	99	99	99	99	99	99	99	99	99	99	99	99
615	NT16-41-615	3	1	2	4	3	4	3	1	1	1	3	3	2	2	2	2	4	4	4	5	2	1	88	1	88	2	1	88	88	88	88	88	88	88	88	88	0	0	3	1	5	1	3	1	2	1	5	4
616	NT16-41-616	3	2	2	4	4	4	1	1	1	1	1	1	1	1	2	4	5	5	1	5	2	1	88	1	88	3	1	88	88	88	88	88	88	88	88	88	0	0	5	1	6	1	4	1	2	0.5	4	1
617	NT16-41-617	99	99	99	99	99	99	99	99	99	99	99	99	99	99	99	99	99	99	99	99	99	99	99	99	99	99	99	99	99	99	99	99	99	99	99	99	99	99	99	99	99	99	99	99	99	99	99	99
618	NT16-41-618	99	99	99	99	99	99	99	99	99	99	99	99	99	99	99	99	99	99	99	99	99	99	99	99	99	99	99	99	99	99	99	99	99	99	99	99	99	99	99	99	99	99	99	99	99	99	99	99
619	NT16-41-619	99	99	99	99	99	99	99	99	99	99	99	99	99	99	99	99	99	99	99	99	99	99	99	99	99	99	99	99	99	99	99	99	99	99	99	99	99	99	99	99	99	99	99	99	99	99	99	99
620	NT16-41-620	99	99	99	99	99	99	99	99	99	99	99	99	99	99	99	99	99	99	99	99	99	99	99	99	99	99	99	99	99	99	99	99	99	99	99	99	99	99	99	99	99	99	99	99	99	99	99	99
621	NT16-41-621	99	99	99	99	99	99	99	99	99	99	99	99	99	99	99	99	99	99	99	99	99	99	99	99	99	99	99	99	99	99	99	99	99	99	99	99	99	99	99	99	99	99	99	99	99	99	99	99
622	NT16-41-622	99	99	99	99	99	99	99	99	99	99	99	99	99	99	99	99	99	99	99	99	99	99	99	99	99	99	99	99	99	99	99	99	99	99	99	99	99	99	99	99	99	99	99	99	99	99	99	99
623	NT16-41-623	3	1	1	4	4	1	2	1	1	1	2	4	2	1	2	3	3	2	1	5	2	1	88	1	88	1	99	99	99	99	99	99	99	99	99	99	99	99	99	99	99	99	99	99	2	1	4	99
624	NT16-41-624	3	3	2	4	1	1	2	1	1	1	2	3	3	2	2	3	3	4	1	5	1	1	88	1	88	2	1	88	88	88	88	88	88	88	88	88	0	0	4	1	4	1	4	1	2	1	4	2
625	NT17-42-625	99	99	99	99	99	99	99	99	99	99	99	99	99	99	99	99	99	99	99	99	99	99	99	99	99	99	99	99	99	99	99	99	99	99	99	99	99	99	99	99	99	99	99	99	99	99	99	99
626	NT17-42-626	99	99	99	99	99	99	99	99	99	99	99	99	99	99	99	99	99	99	99	99	99	99	99	99	99	99	99	99	99	99	99	99	99	99	99	99	99	99	99	99	99	99	99	99	99	99	99	99
627	NT17-42-627	99	99	99	99	99	99	99	99	99	99	99	99	99	99	99	99	99	99	99	99	99	99	99	99	99	99	99	99	99	99	99	99	99	99	99	99	99	99	99	99	99	99	99	99	99	99	99	99
628	NT17-42-628	3	1	2	4	4	1	2	1	1	1	2	3	2	2	2	2	4	4	1	5	1	2	胃潰瘍	1	88	2	1	88	88	88	88	88	88	88	88	88	0	0	6	1	5	2	5	1	2	1	6	1
629	NT17-42-629	99	99	99	99	99	99	99	99	99	99	99	99	99	99	99	99	99	99	99	99	99	99	99	99	99	99	99	99	99	99	99	99	99	99	99	99	99	99	99	99	99	99	99	99	99	99	99	99
630	NT17-43-630	99	99	99	99	99	99	99	99	99	99	99	99	99	99	99	99	99	99	99	99	99	99	99	99	99	99	99	99	99	99	99	99	99	99	99	99	99	99	99	99	99	99	99	99	99	99	99	99
631	NT17-43-631	3	1	2	3	3	3	2	1	1	2	1	3	3	2	2	3	5	5	1	5	2	1	88	1	88	2	1	88	88	88	88	88	88	88	88	88	1	0	6	1	5	2	5	1	2	1	5	4
632	NT17-43-632	2	3	2	4	3	1	1	1	1	1	2	2	3	2	2	4	4	4	1	5	2	2	糖尿， 血壓高	4	糖尿及血壓藥	2	2	1	0	0	0	0	0	0	0		99	99	3	1	3	1	2	1	2	1	2	4
633	NT17-43-633	3	1	1	3	3	3	3	2	1	1	2	2	3	2	2	3	5	5	1	5	1	1	88	1	88	3	1	88	88	88	88	88	88	88	88	88	0	0	7	2	7	2	2	1	2	1	3	2
634	NT17-43-634	99	99	99	99	99	99	99	99	99	99	99	99	99	99	99	99	99	99	99	99	99	99	99	99	99	99	99	99	99	99	99	99	99	99	99	99	99	99	99	99	99	99	99	99	99	99	99	99
635	NT17-43-635	3	4	1	4	4	2	1	1	1	2	3	3	3	2	2	3	4	3	2	5	1	1	88	4	血壓藥	3	1	88	88	88	88	88	88	88	88	88	0	0	6	1	6	1	4	1	3	1	5	1
636	NT17-43-636	2	2	2	3	3	4	2	1	1	1	2	3	1	2	2	3	4	4	1	5	2	1	88	1	88	2	2	0	0	0	0	0	1	0	0		1	99	6	1	6	1	5	1	2	1	3	2
637	NT17-43-637	99	99	99	99	99	99	99	99	99	99	99	99	99	99	99	99	99	99	99	99	99	99	99	99	99	99	99	99	99	99	99	99	99	99	99	99	99	99	99	99	99	99	99	99	99	99	99	99
638	NT17-44-638	3	1	2	3	1	1	3	1	1	3	2	2	3	2	2	2	3	3	1	5	1	2	少許坐骨神經痛，腰痛，腳痛加無力，間中頭暈	4	消炎藥1次	2	1	88	88	88	88	88	88	88	88	88	0	0	6	1	5	1-2	5	0.5	2	0.25	6	2-3
639	NT17-44-639	99	99	99	99	99	99	99	99	99	99	99	99	99	99	99	99	99	99	99	99	99	99	99	99	99	99	99	99	99	99	99	99	99	99	99	99	99	99	99	99	99	99	99	99	99	99	99	99
640	NT17-44-640	99	99	99	99	99	99	99	99	99	99	99	99	99	99	99	99	99	99	99	99	99	99	99	99	99	99	99	99	99	99	99	99	99	99	99	99	99	99	99	99	99	99	99	99	99	99	99	99
641	NT17-44-641	3	1	1	4	4	2	2	2	1	1	2	2	1	1	1	3	4	5	1	5	1	1	88	1	88	2	2	0	0	0	0	1	0	0	0		0	0	6	1	6	2	5	1	4	1	4	1
642	NT17-44-642	99	99	99	99	99	99	99	99	99	99	99	99	99	99	99	99	99	99	99	99	99	99	99	99	99	99	99	99	99	99	99	99	99	99	99	99	99	99	99	99	99	99	99	99	99	99	99	99
643	NT17-44-643	99	99	99	99	99	99	99	99	99	99	99	99	99	99	99	99	99	99	99	99	99	99	99	99	99	99	99	99	99	99	99	99	99	99	99	99	99	99	99	99	99	99	99	99	99	99	99	99
644	NT17-44-644	99	99	99	99	99	99	99	99	99	99	99	99	99	99	99	99	99	99	99	99	99	99	99	99	99	99	99	99	99	99	99	99	99	99	99	99	99	99	99	99	99	99	99	99	99	99	99	99
645	NT17-44-645	99	99	99	99	99	99	99	99	99	99	99	99	99	99	99	99	99	99	99	99	99	99	99	99	99	99	99	99	99	99	99	99	99	99	99	99	99	99	99	99	99	99	99	99	99	99	99	99
646	NT17-44-646	99	99	99	99	99	99	99	99	99	99	99	99	99	99	99	99	99	99	99	99	99	99	99	99	99	99	99	99	99	99	99	99	99	99	99	99	99	99	99	99	99	99	99	99	99	99	99	99
647	NT17-44-647	99	99	99	99	99	99	99	99	99	99	99	99	99	99	99	99	99	99	99	99	99	99	99	99	99	99	99	99	99	99	99	99	99	99	99	99	99	99	99	99	99	99	99	99	99	99	99	99
648	NT17-44-648	2	3	2	3	4	4	2	1	1	1	2	2	1	1	2	2	3	4	1	5	2	2	容易肚瀉、胃脹	4	止痛消炎、胃藥	3	1	88	88	88	88	88	88	88	88	88	0-1	0	6	1-2	3	2-4	3	1-2	2	1	5	2-4
649	NT17-44-649	3	1	2	4	4	2	2	1	1	1	2	2	2	1	1	1	5	5	1	5	1	1	88	1	88	2	1	88	88	88	88	88	88	88	88	88	0	0	5	1	6	1	5	1	3	1	5	1
650	NT17-44-650	3	1	2	3	3	3	3	1	1	1	2	3	1	1	2	2	3	3	1	5	1	2	血色素低	4	鐵丸	2	1	88	88	88	88	88	88	88	88	88	0	0	6	1	5	1	4	0.5	2	1	4	0.5
651	NT17-44-651	3	1	1	1	4	1	3	1	1	1	1	2	1	2	2	3	5	5	1	1	2	2	99	1	88	3	1	88	88	88	88	88	88	88	88	88	0	0	4	1	4	1	4	1	1	1	4	1
652	NT18-45-652	3	3	1	1	2	2	2	2	1	1	1	3	2	1	2	3	5	4	1	5	1	2	濕疹、皮膚敏感	4	吃中藥	3	2	0	0	1	0	1	0	0	0		1	99	2	1	6	1	5	1	5	1	3	1
653	NT18-45-653	3	1	2	1	3	3	1	1	1	1	2	3	4	2	2	2	4	2	1	5	2	1	88	2	88	3	1	88	88	88	88	88	88	88	88	88	0	0	6	1	5	1	6	1	3	1	5	3
654	NT18-45-654	99	99	99	99	99	99	99	99	99	99	99	99	99	99	99	99	99	99	99	99	99	99	99	99	99	99	99	99	99	99	99	99	99	99	99	99	99	99	99	99	99	99	99	99	99	99	99	99
655	NT18-45-655	99	99	99	99	99	99	99	99	99	99	99	99	99	99	99	99	99	99	99	99	99	99	99	99	99	99	99	99	99	99	99	99	99	99	99	99	99	99	99	99	99	99	99	99	99	99	99	99
656	NT18-45-656	99	99	99	99	99	99	99	99	99	99	99	99	99	99	99	99	99	99	99	99	99	99	99	99	99	99	99	99	99	99	99	99	99	99	99	99	99	99	99	99	99	99	99	99	99	99	99	99
657	NT18-45-657	99	99	99	99	99	99	99	99	99	99	99	99	99	99	99	99	99	99	99	99	99	99	99	99	99	99	99	99	99	99	99	99	99	99	99	99	99	99	99	99	99	99	99	99	99	99	99	99
658	NT18-45-658	99	99	99	99	99	99	99	99	99	99	99	99	99	99	99	99	99	99	99	99	99	99	99	99	99	99	99	99	99	99	99	99	99	99	99	99	99	99	99	99	99	99	99	99	99	99	99	99
659	NT18-45-659	99	99	99	99	99	99	99	99	99	99	99	99	99	99	99	99	99	99	99	99	99	99	99	99	99	99	99	99	99	99	99	99	99	99	99	99	99	99	99	99	99	99	99	99	99	99	99	99
660	NT18-45-660	3	3	2	4	4	4	2	1	1	1	2	3	1	2	2	2	5	5	1	5	1	1	88	1	88	2	1	88	88	88	88	88	88	88	88	88	2	99	2	1	6	1	6	1	2	1	6	1
661	NT18-45-661	99	99	99	99	99	99	99	99	99	99	99	99	99	99	99	99	99	99	99	99	99	99	99	99	99	99	99	99	99	99	99	99	99	99	99	99	99	99	99	99	99	99	99	99	99	99	99	99
662	NT18-45-662	99	99	99	99	99	99	99	99	99	99	99	99	99	99	99	99	99	99	99	99	99	99	99	99	99	99	99	99	99	99	99	99	99	99	99	99	99	99	99	99	99	99	99	99	99	99	99	99
663	NT18-45-663	3	3	2	3	3	1	2	2	1	2	2	3	3	2	2	3	4	4	1	5	1	1	88	4	過敏藥	2	2	0	0	0	0	1	0	0	0		0	0	6	1	5	1-2	4	1	2	1	5	1-2
664	NT18-45-664	3	1	1	4	3	3	1	1	4	1	4	3	3	2	2	4	5	5	4	4	1	2	胃病	4	99	3	2	1	0	0	1	0	0	0	0		1	99	5	1	3	1	3	1	1	0	4	3
665	NT18-45-665	3	3	2	4	4	3	2	2	1	1	2	3	3	2	2	3	4	4	1	5	1	1	88	2	88	2	1	88	88	88	88	88	88	88	88	88	0.5	99	6	1	5	1	3	1	3	0.75	6	1
666	NT18-45-666	3	1	1	4	3	4	2	2	1	1	1	3	2	2	2	3	4	4	1	5	2	1	88	1	88	2	1	88	88	88	88	88	88	88	88	88	0	0	6	1	5	1	5	1	2	1	6	1
667	NT18-45-667	99	99	99	99	99	99	99	99	99	99	99	99	99	99	99	99	99	99	99	99	99	99	99	99	99	99	99	99	99	99	99	99	99	99	99	99	99	99	99	99	99	99	99	99	99	99	99	99
668	NT18-45-668	99	99	99	99	99	99	99	99	99	99	99	99	99	99	99	99	99	99	99	99	99	99	99	99	99	99	99	99	99	99	99	99	99	99	99	99	99	99	99	99	99	99	99	99	99	99	99	99
[truncated: 4 more columns]
